# Supplementary material
Source: Research Square preprint supplement (doi:10.21203/rs.3.rs-9243909/v1)
Supplement: Supplementary file 1 [file 5c1696d63d02227c4f433489.docx]

**Supporting Information**

**Polytetrafluoroethylene-Inspired Intrinsically Moisture-Resistant Semiconductor for Gas Sensing**

Jie Chen1,3, Ying-Xue Jin1, Xiao-Liang Ye1, Yi-Ming Xu1, Yu Chang1,3, Guan-E Wang*,1,2,3, and Gang Xu*,1,2,3

1 State Key Laboratory of Structural Chemistry, Fujian Provincial Key Laboratory of Materials and Techniques toward Hydrogen Energy, Fujian Institute of Research on the Structure of Matter, Chinese Academy of Sciences (CAS), Fuzhou 350002, China

2 Fujian Science & Technology Innovation Laboratory for Optoelectronic Information of China, Fuzhou, Fujian 350108, PR China

3 University of Chinese Academy of Sciences (UCAS), Beijing 100049, PR China

Correspondence and requests for materials should be addressed to Gang Xu and Guan-E Wang.

(email: gxu@fjirsm.ac.cn) (email: gewang@fjirsm.ac.cn)

Table of Contents

[**Supplementary Experimental Procedures** 3](#_Toc225458072)

[**Figure. S1.** Packing structure of **Cd-NTP**. 5](#_Toc225458073)

[**Figure. S2**. Fourier-transform infrared (FT-IR) spectra of **Cd-NTP** and NTP. 5](#_Toc225458074)

[**Figure. S3.** X-ray photoelectron spectroscopy (XPS) spectra of O 1*s* and S 2*p* for **Cd-NTP**. 5](#_Toc225458075)

[**Figure. S4.** Thermogravimetric analysis (TGA) of **Cd-NTP**. 6](#_Toc225458076)

[**Figure. S5.** I-V curves of **Cd-NTP** under different temperatures. 6](#_Toc225458077)

[**Figure. S6.**  Ultraviolet photoelectron spectroscopy (UPS) spectrum of **Cd-NTP**. 6](#_Toc225458078)

[**Figure. S7.** Calculated projected density of states (PDOS). 7](#_Toc225458079)

[**Figure. S8.** Water contact angle patterns of **Cd-NTP** and NTP at different time. 7](#_Toc225458080)

[**Figure. S9**. Resonant microcantilever measurements of **Cd-NTP**. 7](#_Toc225458081)

[**Figure. S10.** Adsorption enthalpy of **Cd-NTP** on water at different adsorption amounts. 8](#_Toc225458082)

[**Figure. S11.** Scanning electron microscope (SEM) and Atomic Force Microscope (AFM) image of **Cd-NTP** nanowires. 8](#_Toc225458083)

[**Figure. S12.** Powder X-ray diffraction (PXRD) pattern of **Cd-NTP**. 8](#_Toc225458084)

[**Figure. S13.** Humidity sensitivity test of **Cd-NTP**. 9](#_Toc225458085)

[**Figure. S14.** Resonant microcantilever measurements of **Cd-NTP**. 9](#_Toc225458086)

[**Figure. S15.** Adsorption enthalpy of **Cd-NTP** on NH3 at different adsorption amounts. 9](#_Toc225458087)

[**Figure. S16.** PXRD of **Cd-NTP** after exposure to NH3. 10](#_Toc225458088)

[**Figure. S17.** Long-term stability of **Cd-NTP** device to 50 ppm NH3. 10](#_Toc225458089)

[**Figure. S18.** Ammonia response variation of different moisture-resistant materials under humidity. 10](#_Toc225458090)

[**Figure. S19.** Response and recovery time of **Cd-NTP** to ammonia at different humidity (calculated as the time to reach 90% response or recovery). 11](#_Toc225458091)

[**Figure. S20.** A response comparison of **Cd-NTP** towards NH3 and interfering gases of 100 ppm. 11](#_Toc225458092)

[**Figure. S21.** Quantitative capacity measurements of **Cd-NTP** towards 200 ppm H2O. 11](#_Toc225458093)

[**Figure. S22.** Homemade gas sensing test system. 12](#_Toc225458095)

[**Table S1.** High-symmetry k-point coordinates in the Brillouin zone used for the band-structure calculations of **Cd-NTP**. 13](#_Toc225458096)

[**Table S2.** Calculated and measured (with EA and ICP-AES) elemental mass percentage of **Cd-NTP**. 14](#_Toc225458097)

[**Table S3.** Reported NH3 gas-sensing materials working at room temperature. 15](#_Toc225458098)

[**Table S4.** Ammonia response variation of different moisture-resistant materials under humidity. 16](#_Toc225458099)

[**Table S5.** Crystallographic information of **Cd-NTP**. 17](#_Toc225458100)

[**Table S6.** Unit cell parameters of **Cd-NTP** after Pawley refinement of XRD data. 18](#_Toc225458101)

[**References** 19](#_Toc225458102)

**Supplementary Experimental Procedures**

**Single-crystal structure analysis**

The single crystal diffraction data was collected on a Rigaku XtaLAB Synergy R diffractometer equipped with a HyPix hybrid pixel array detector using Cu K*α* radiation (*λ* = 1.54184 Å) at 100 K (*ω* scans). Data reduction and an empirical multi-scan absorption correction were performed with CrysAlisPro 1.171.42.93a (Rigaku Oxford Diffraction). The structure was solved by intrinsic phasing using SHELXT and refined by full-matrix least-squares on *F*2 with SHELXL-2018/3 within Olex2 1.51, 2. All non-hydrogen atoms were refined anisotropically; hydrogen atoms were placed in calculated positions and refined using a riding model. PXRD data were collected on a Rigaku SmartLab XE diffractometer using Cu K*α* radiation (*λ*1 = 1.540593 Å, *λ*2 = 1.544414 Å) in Bragg–Brentano geometry. Whole-pattern fitting was performed by Pawley refinement, in which the atomic coordinates were kept fixed and only the unit-cell parameters (*a*, *b*, *c*, *α*, *β*, *γ*) together with instrumental parameters were refined. The crystal information and refinement information collected from the single crystal are shown in Tables S5 and S6, respectively.

**Gas adsorption test**

The **Cd-NTP** nanowires were dispersed in ethanol and then loaded onto the front of the micro-cantilever of the chip using a micro-cantilever microscope. The testing was performed using a chip-based resonant micro-cantilever molecular adsorption analyzer (LoC-TGA 3000, resolution of 1 Hz/pg).After thorough drying, the amount of NH3 or H2O adsorbed by the sample was measured by detecting the vibration frequency of the cantilever beam at different concentrations, ranging from 5 ppm to 200 ppm for NH3 and 10-90% RH for H2O. The adsorption enthalpy () was calculated by the Clausius-Clapeyron equation. The partial pressure at different temperatures for the same coverage (*θ*) was calculated by taking the partial pressure at the same adsorption amount from two adsorption isotherms.

The Clausius-Clapeyron equation is expressed as:

Integration:

The adsorption enthalpy is the average value calculated under five different adsorption amounts (Figure S10 and Figure S15).

***In situ* diffuse reflectance infrared Fourier transform spectroscopy collection**

DRIFTS spectra were collected using a Nicolet 6700 FT-IR spectrometer equipped with an MCT/A detector cooled by liquid nitrogen. To monitor real test conditions, all spectra were collected under synthetic air (79% nitrogen, 21% oxygen) using OMNIC software for data collection.

Before testing, a raw diffuse reflectance infrared absorption spectrum of KBr was acquired as a background for sample testing. This was done by passing high purity argon gas at 80 °C for 1 hour to remove adsorbed moisture and other gas molecules. After the sample and sample chamber had cooled to room temperature for 30 minutes, synthetic air was passed through to purge the chamber. Next, **Cd-NTP** nanowires (60 mg) were loaded into the sample compartment, and the synthetic air purging operations were repeated. The sample was then treated with a xenon arc lamp (PLS-SXE300D) at a light intensity of 360 klx, filtered to 420-760 nm, and the initial spectrum of the sample was collected as a background. Following this, 100 ppm of NH3 was injected, and its spectrum was collected.

**DFT calculation**

Density-functional theory (DFT) calculations were conducted using the Cambridge Serial Total Energy Package (CASTEP) module within the Materials Studio software suite. The Perdew-Burke-Ernzerhof (PBE) exchange-correlation functional with the generalized gradient approximation (GGA) was employed for all calculations. Orbital calculations utilized a plane-wave basis set along with OTFG ultrasoft pseudopotentials. The plane-wave cutoff energy was set at 571.4 eV, and a Monkhorst-Pack mesh of 4×2×1 k-points was used for sampling. Convergence thresholds were 1 × 10-5 eV per atom for total energy and 0.03 eV Å-1 for forces. After optimizing bulk **Cd-NTP**, a 1 × 3 × 1 supercell slab exposing surface nitro groups with a 15 Å vacuum along the c-axis was constructed and fully relaxed. Electron-density-difference maps were obtained from the converged wavefunctions to visualize gas-surface charge redistribution. The dipole moment and electrostatic potential of **Cd-NTP** were calculated on the minimal repeating unit using the Density Functional Theory Molecular Orbital Package 3 (DMol3) module in the Materials Studio package. All geometry optimizations and electrostatic calculations used the PBE functional within the GGA framework and the DNP basis set (basis set file version 3.5), with an energy convergence threshold of 1 × 10-5 Ha per atom and a force threshold of 0.002 Ha Å-1. The orbital cutoff quality was set to fine and a 4 × 2 × 1 Monkhorst-Pack grid was used.

**Supporting Figures**


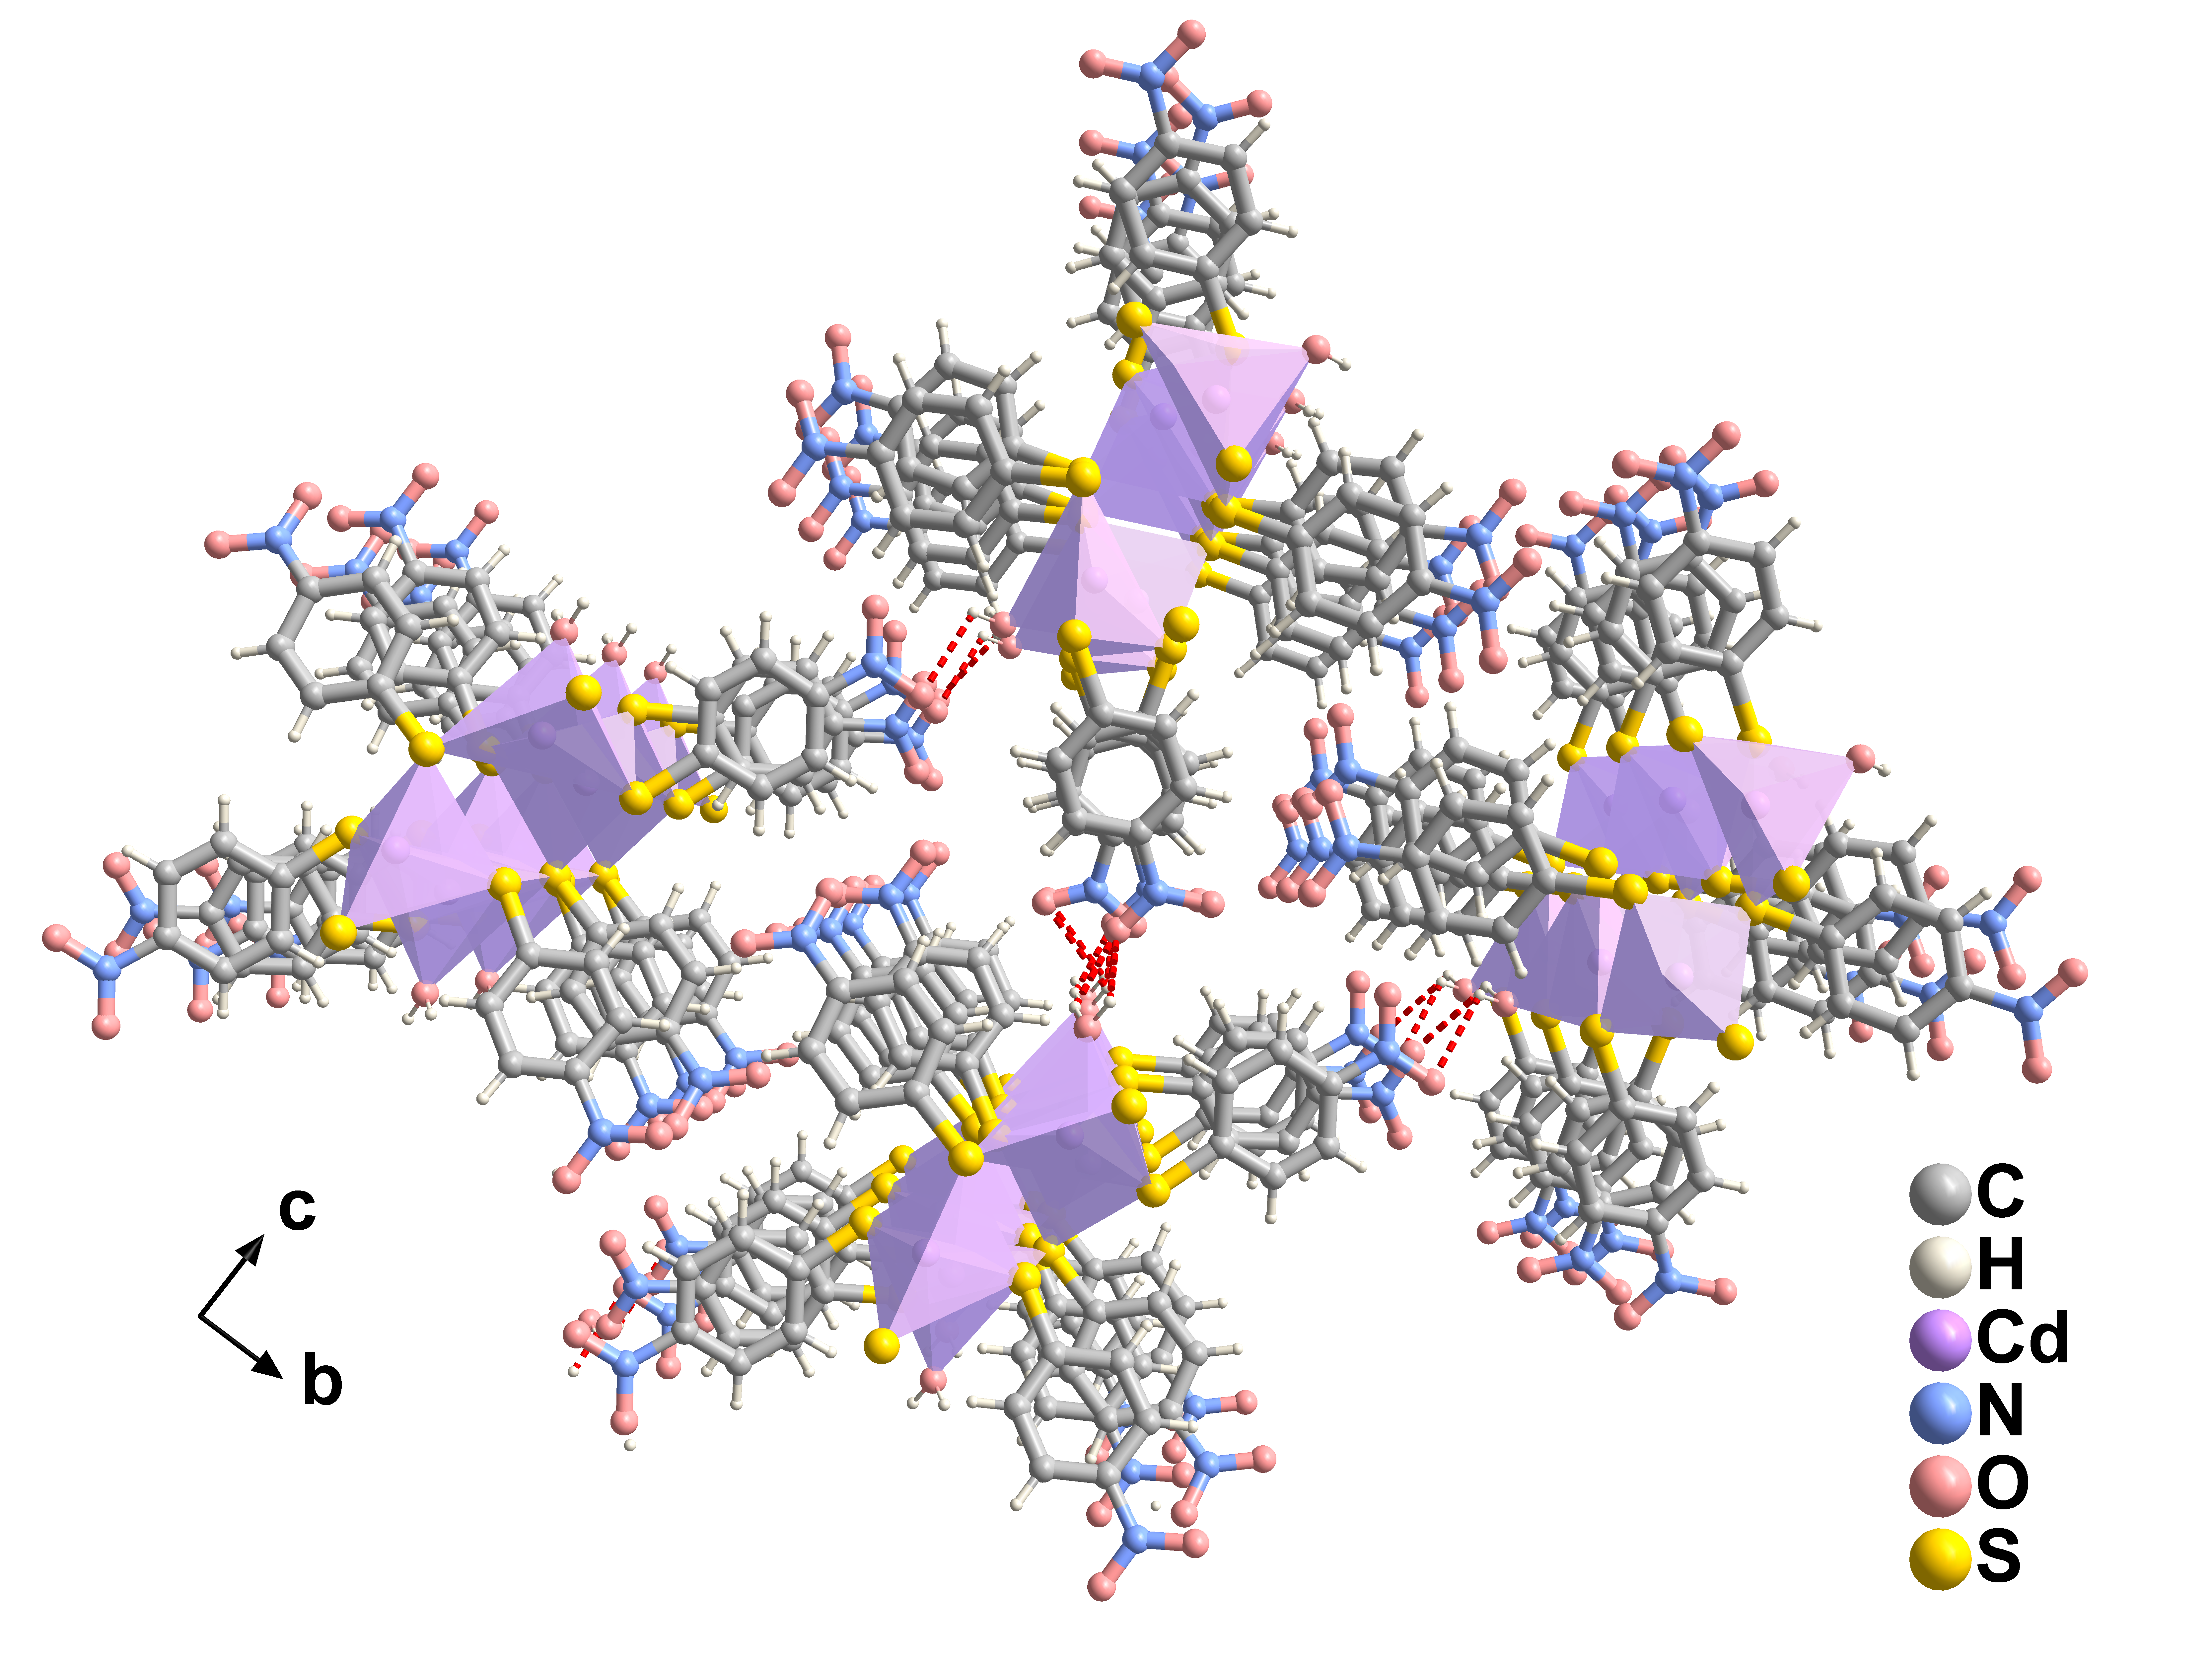


**Figure. S1.** Packing structure of **Cd-NTP**.


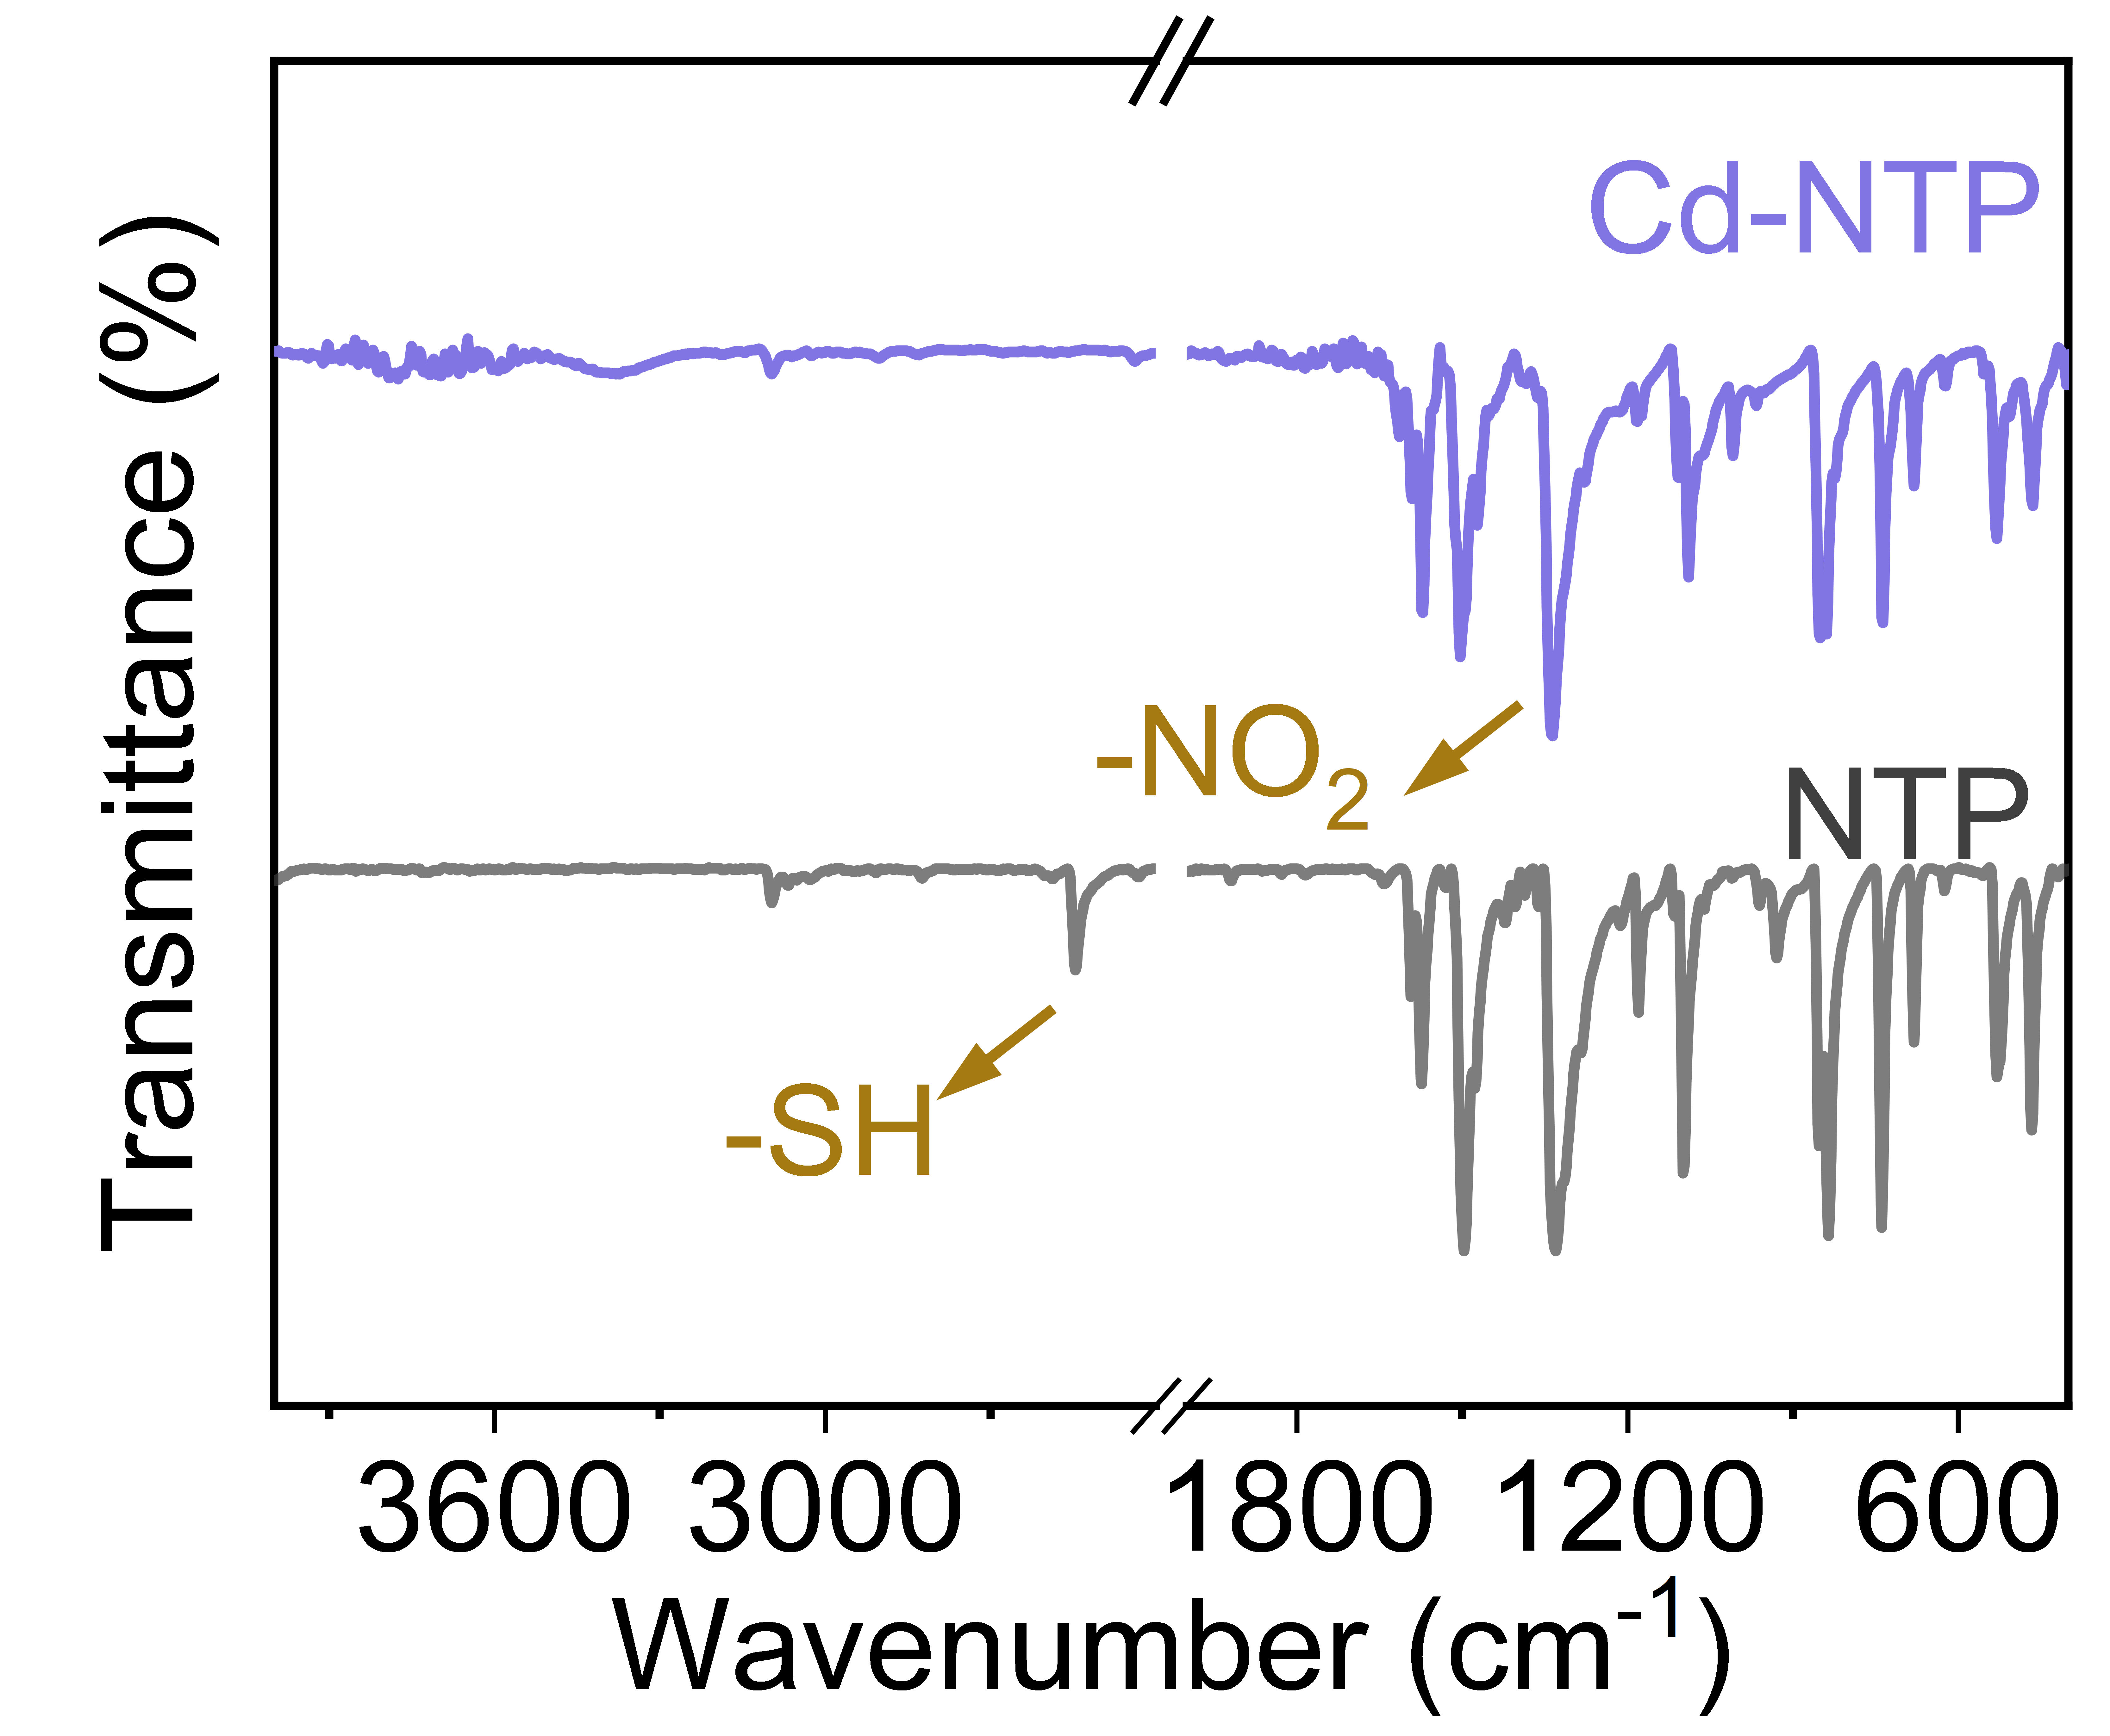


**Figure. S2**. Fourier-transform infrared (FT-IR) spectra of **Cd-NTP** and NTP.


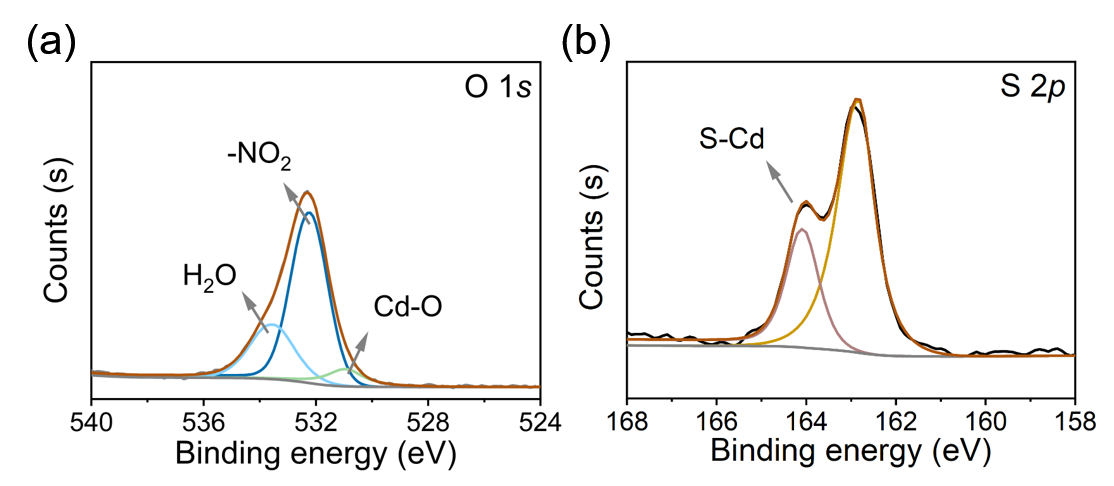


**Figure. S3.** X-ray photoelectron spectroscopy (XPS) spectra of (a) O 1*s* and (b) S 2*p* for **Cd-NTP**.


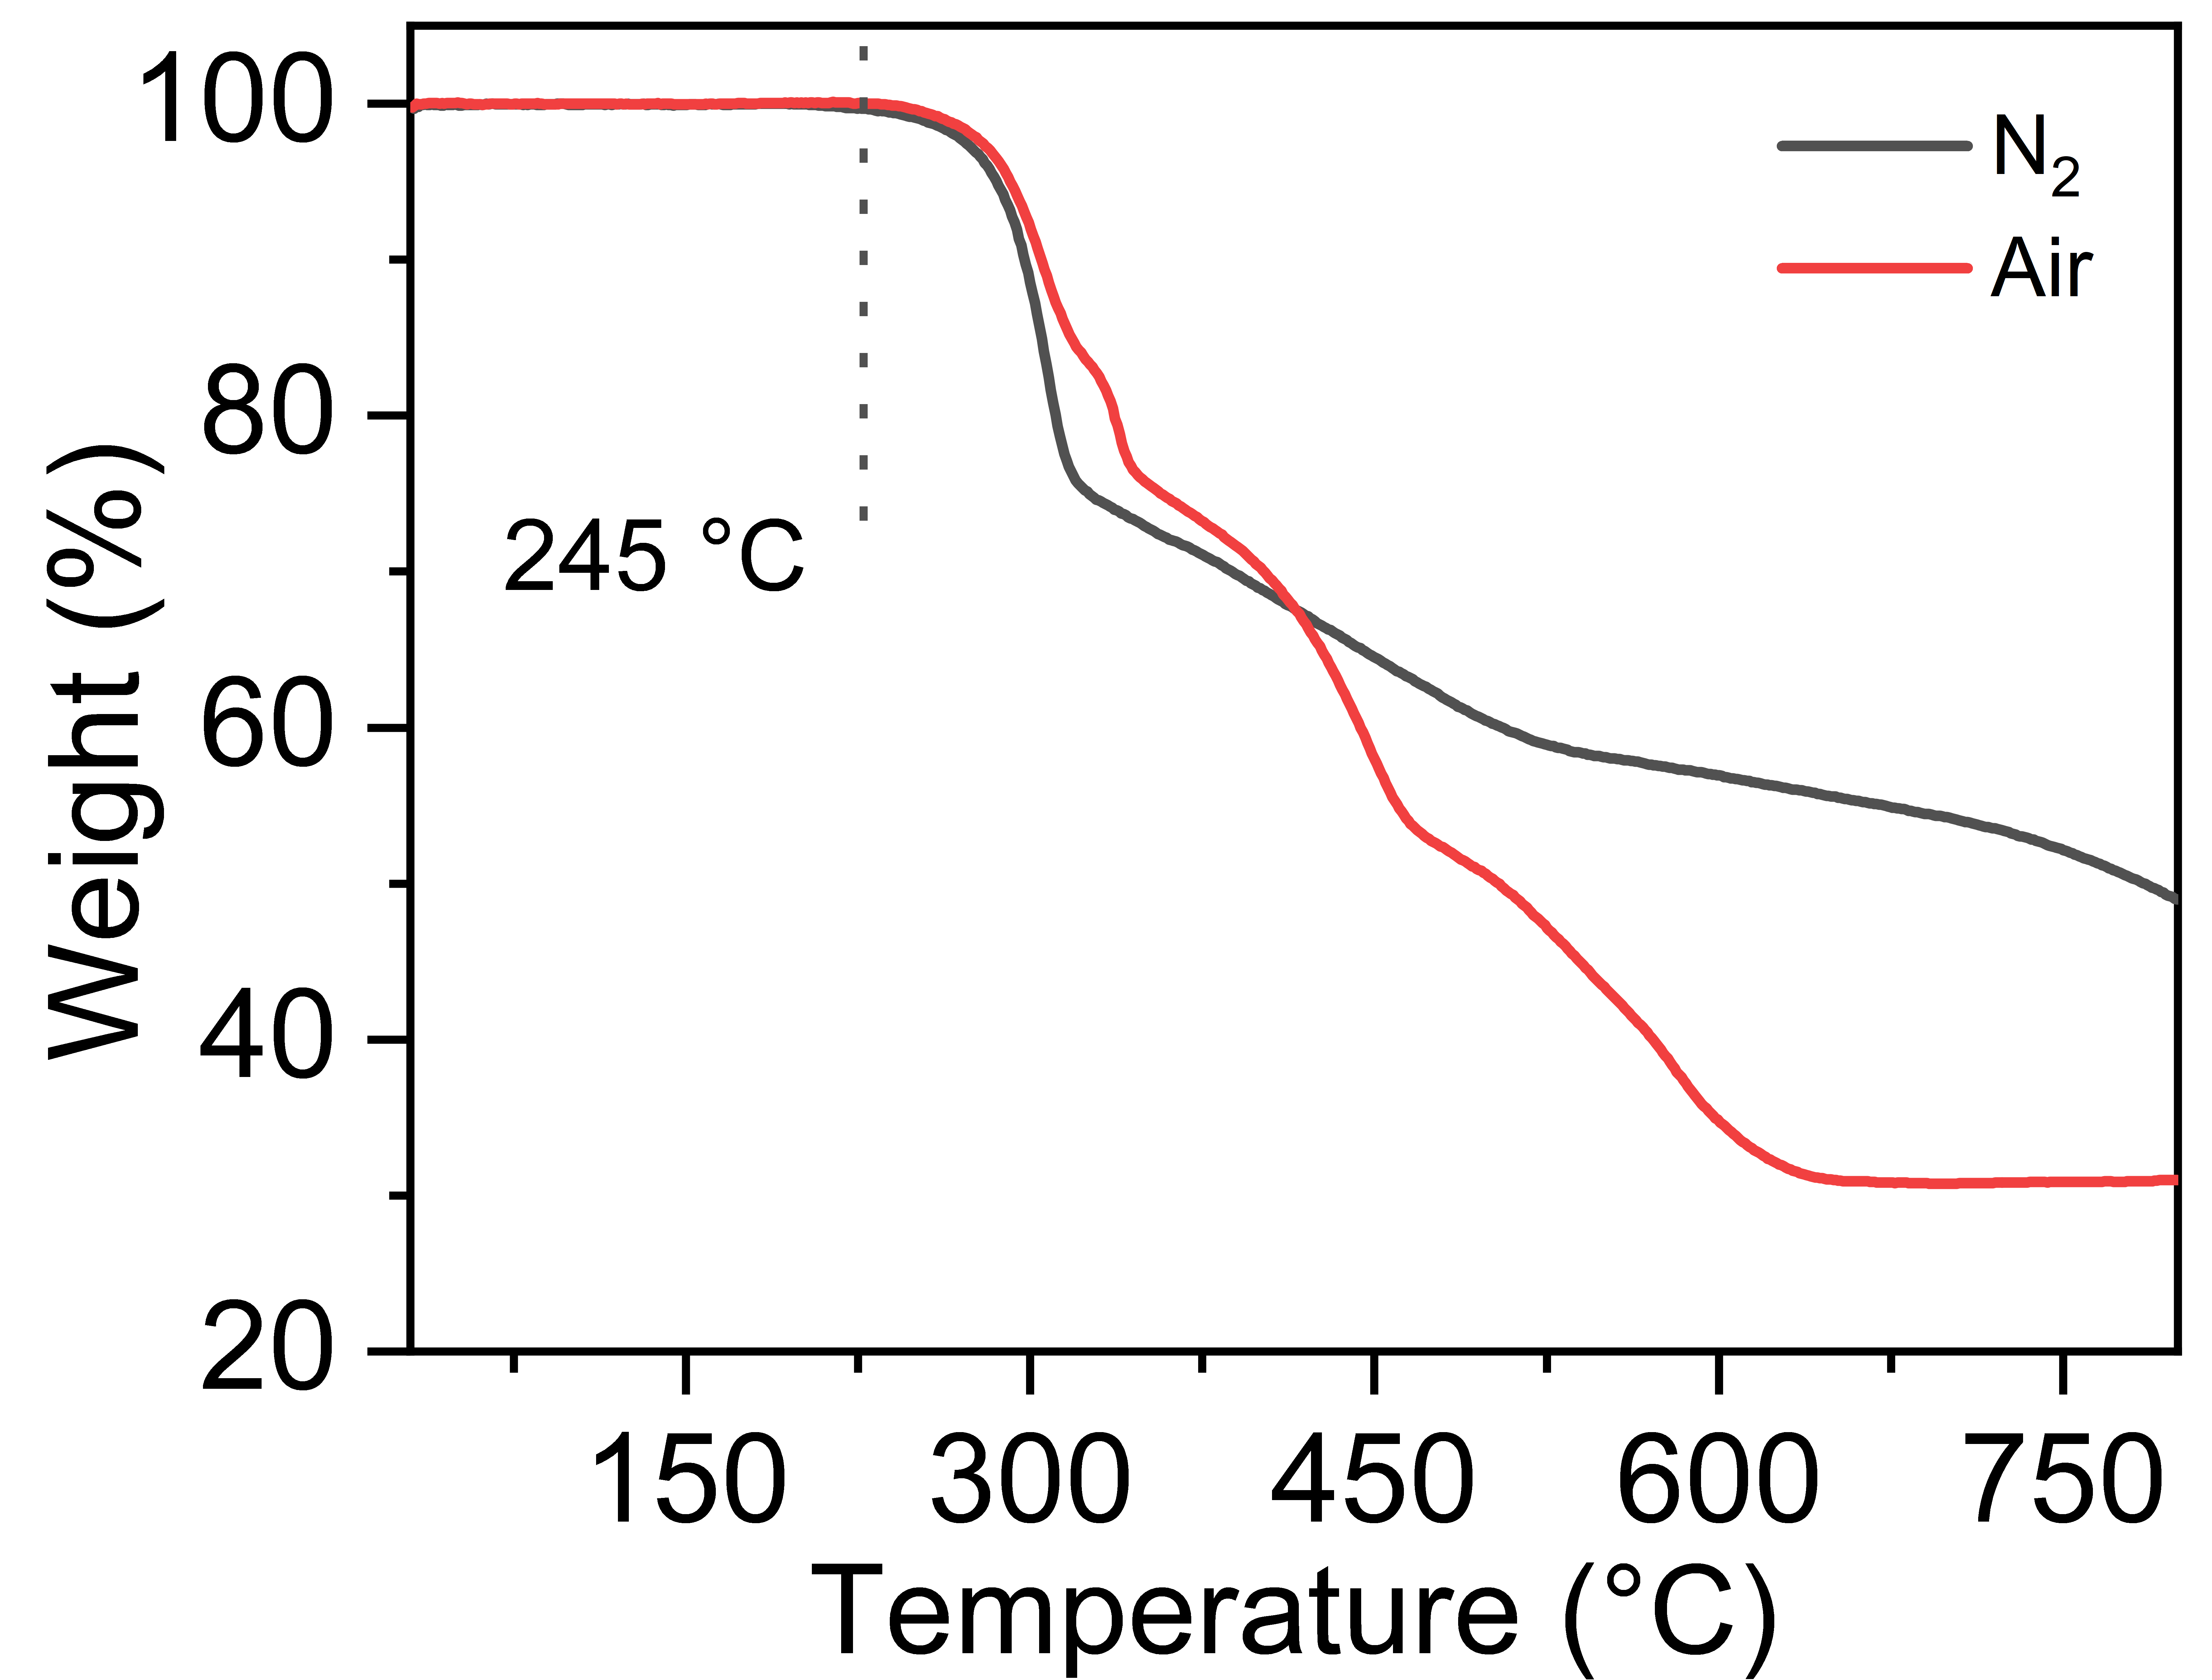


**Figure. S4.** Thermogravimetric analysis (TGA) of **Cd-NTP**.


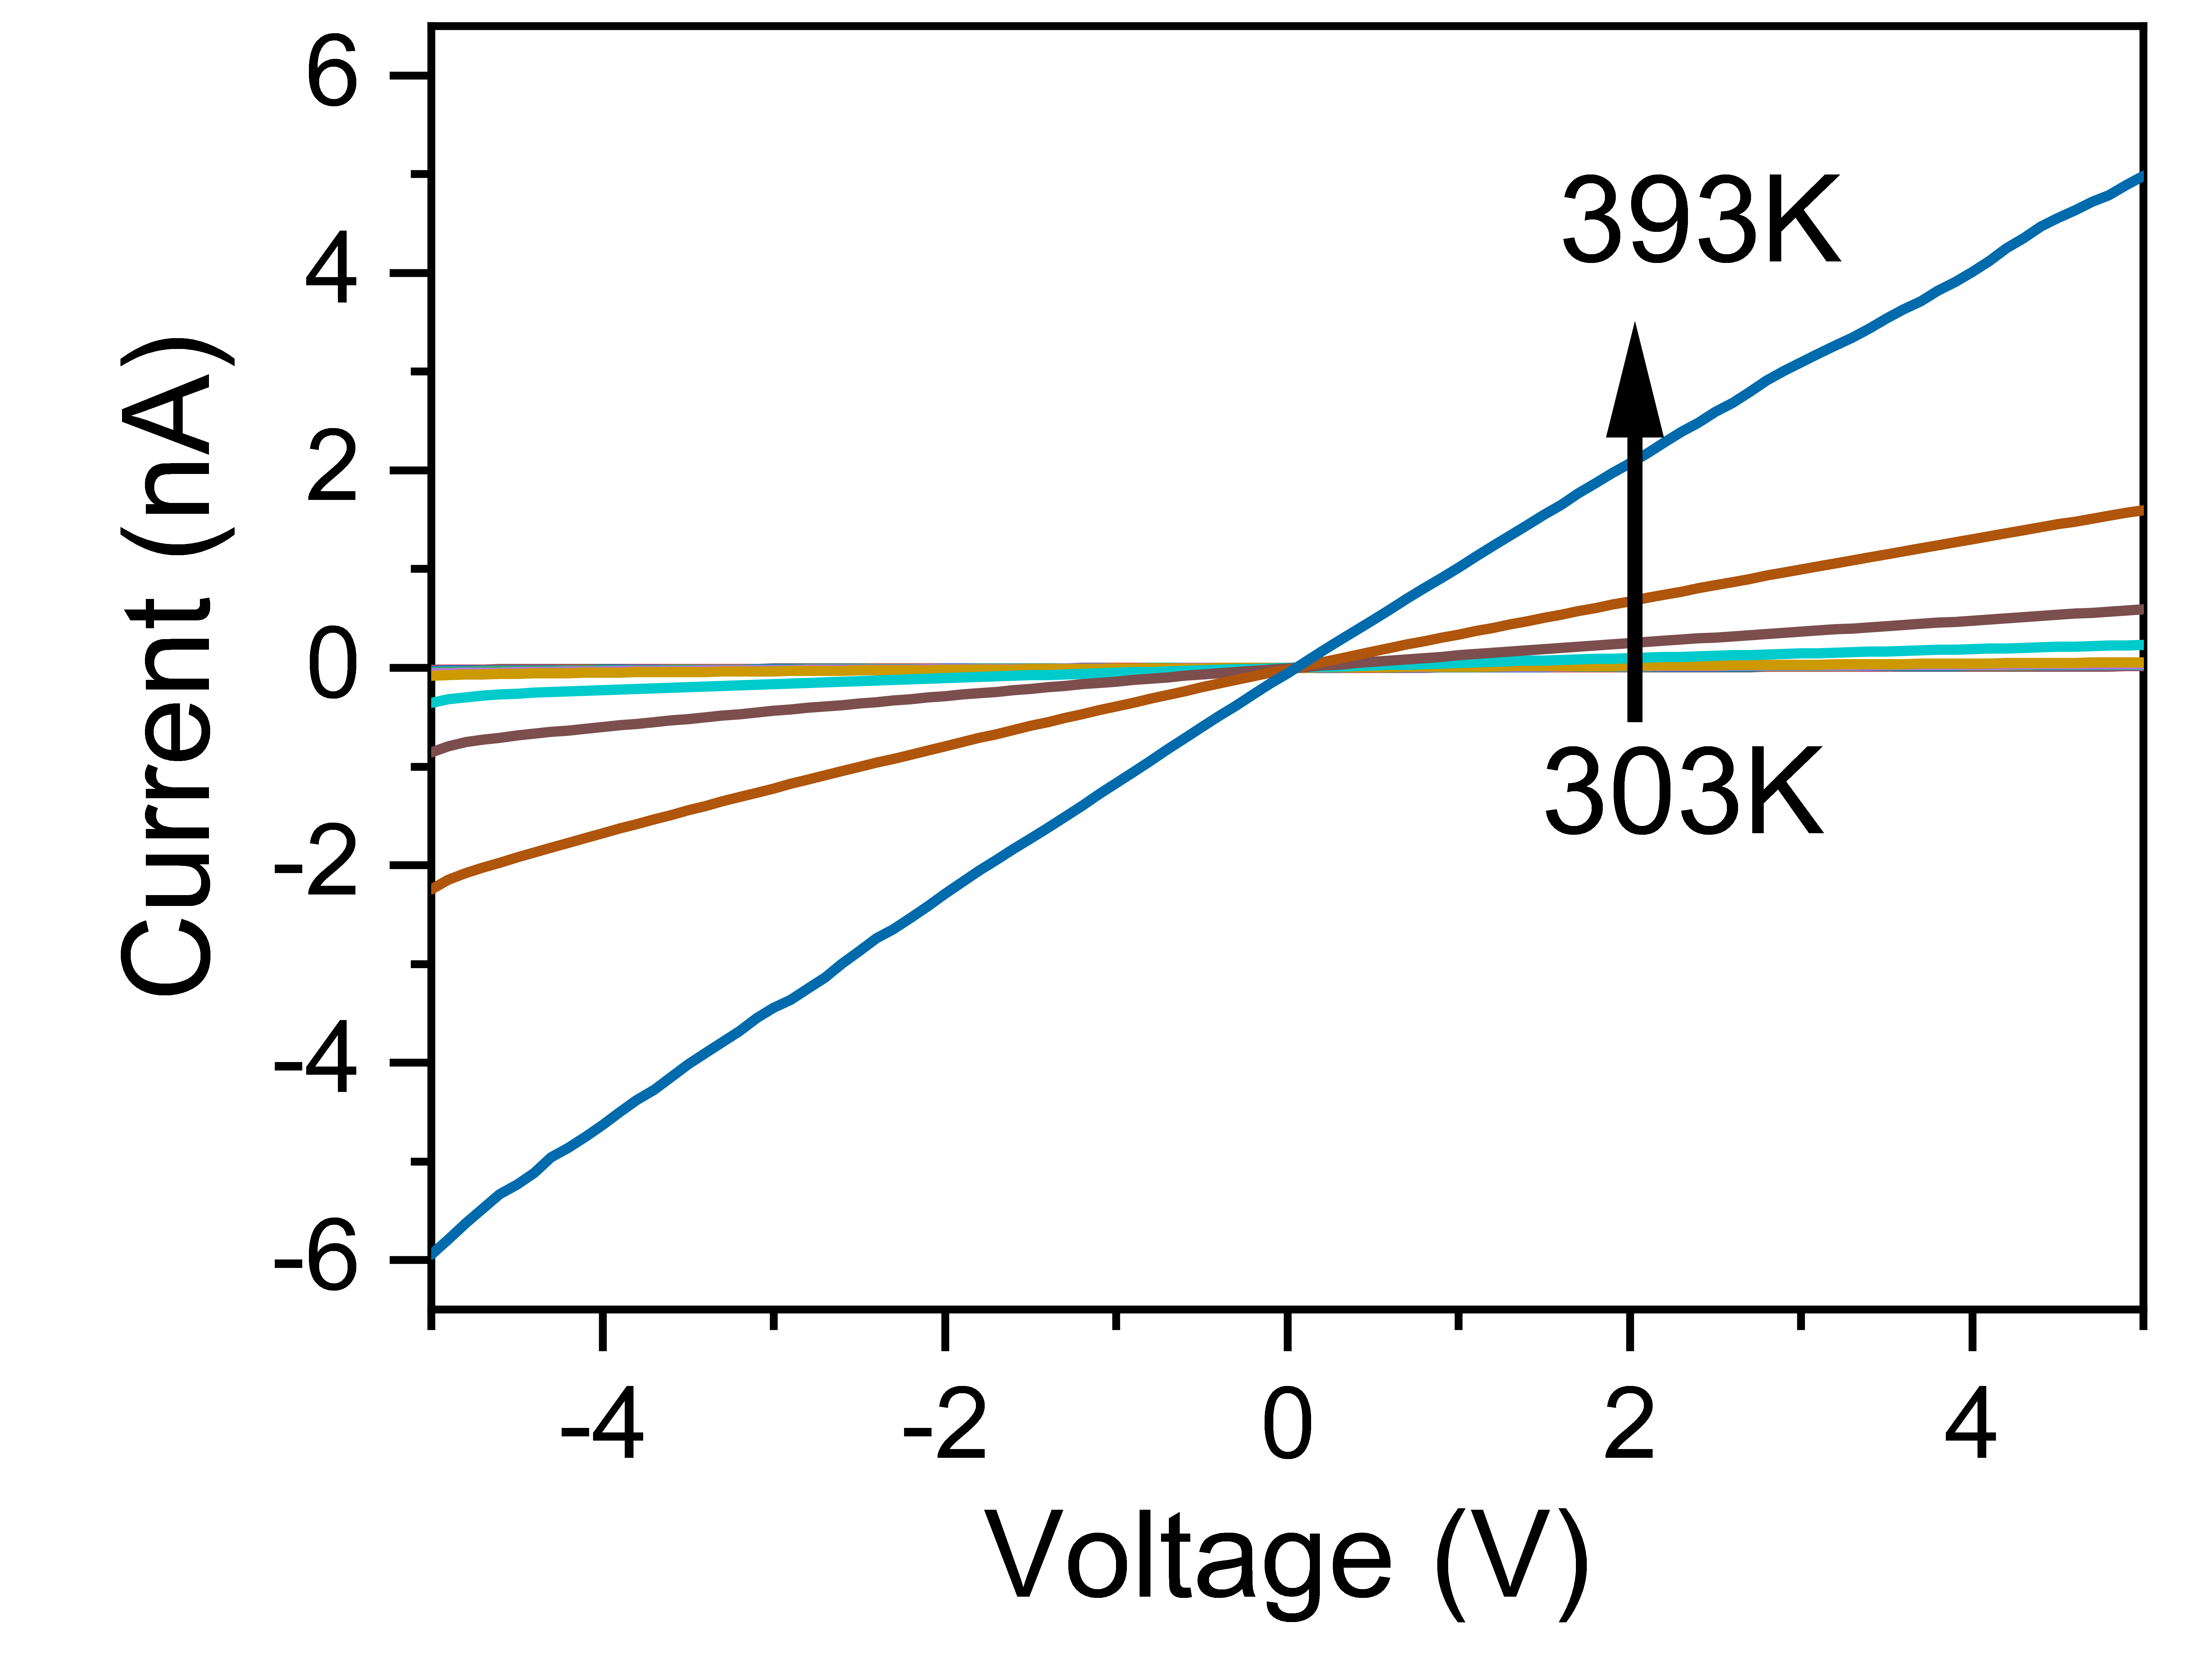


**Figure. S5.** I-V curves of **Cd-NTP** under different temperatures.


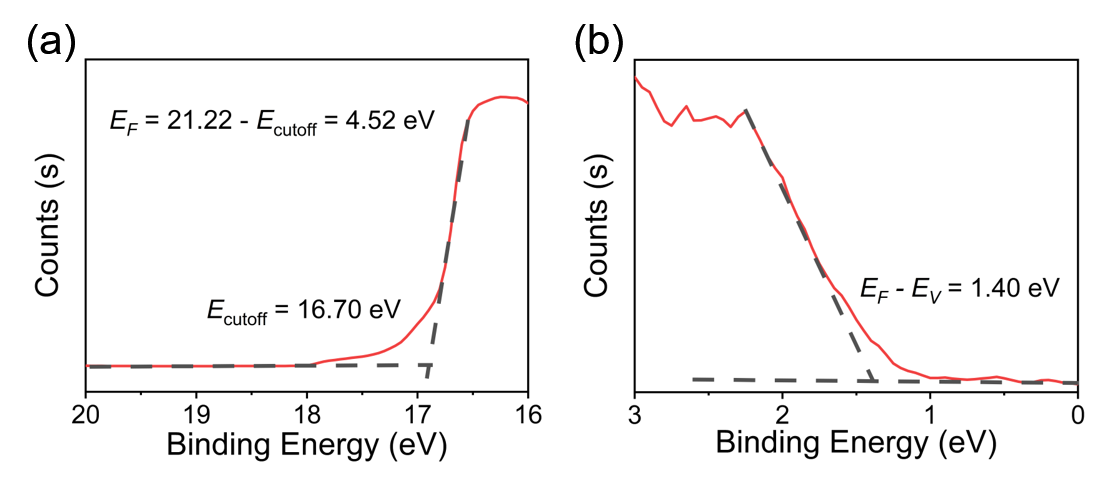


**Figure. S6.** Ultraviolet photoelectron spectroscopy (UPS) spectrum of **Cd-NTP**. (a) the secondary electron cut off edge measured with He I (*hν* = 21.22 eV). (b) Valence band of **Cd-NTP** with respect to the Fermi level (*EF* = 0).


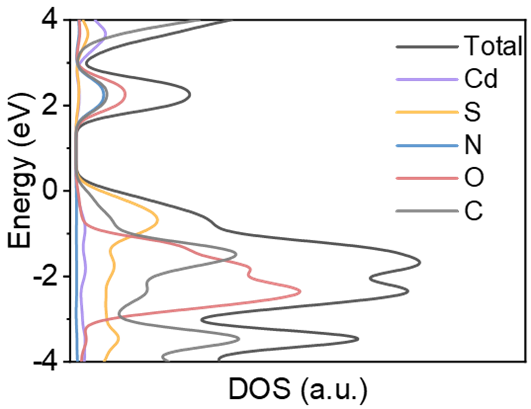


**Figure. S7.** Calculated projected density of states (PDOS).


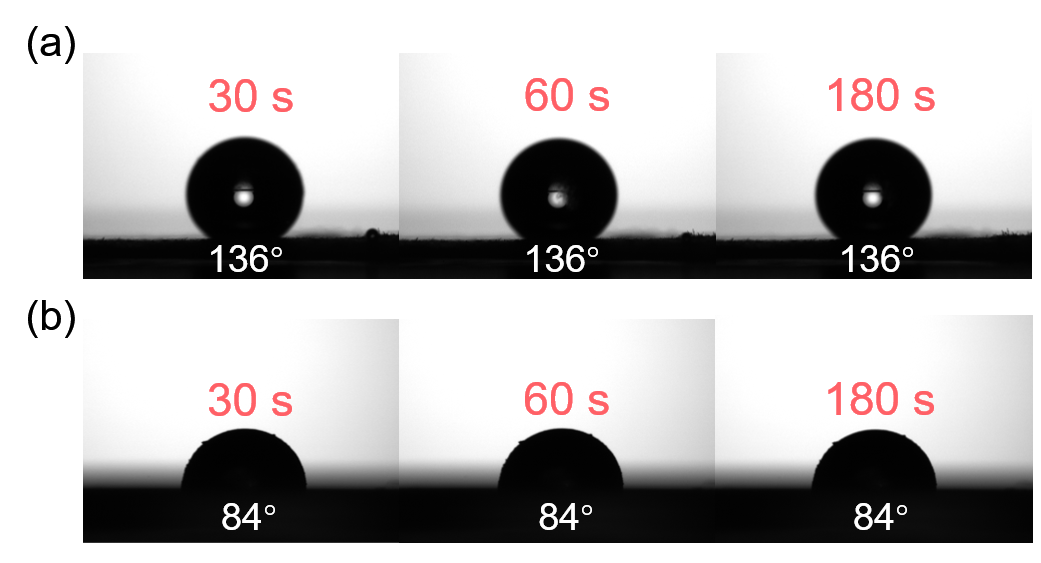


**Figure. S8.** Water contact angle patterns of (a) **Cd-NTP** and (b) NTP at different time.


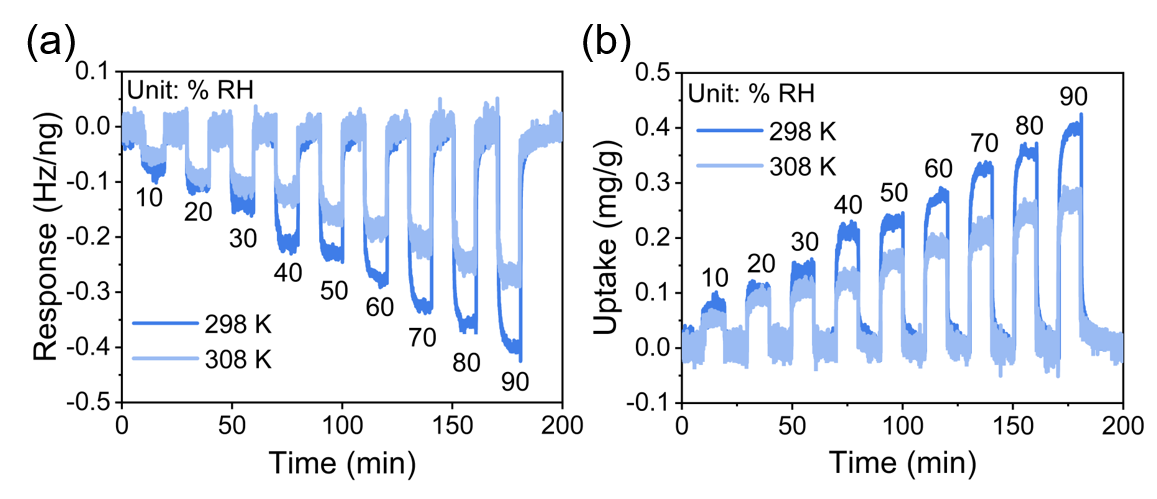


**Figure. S9.** Resonant microcantilever measurements of **Cd-NTP**: (a) response to H2O and (b) corresponding uptake at 298 K and 308 K.


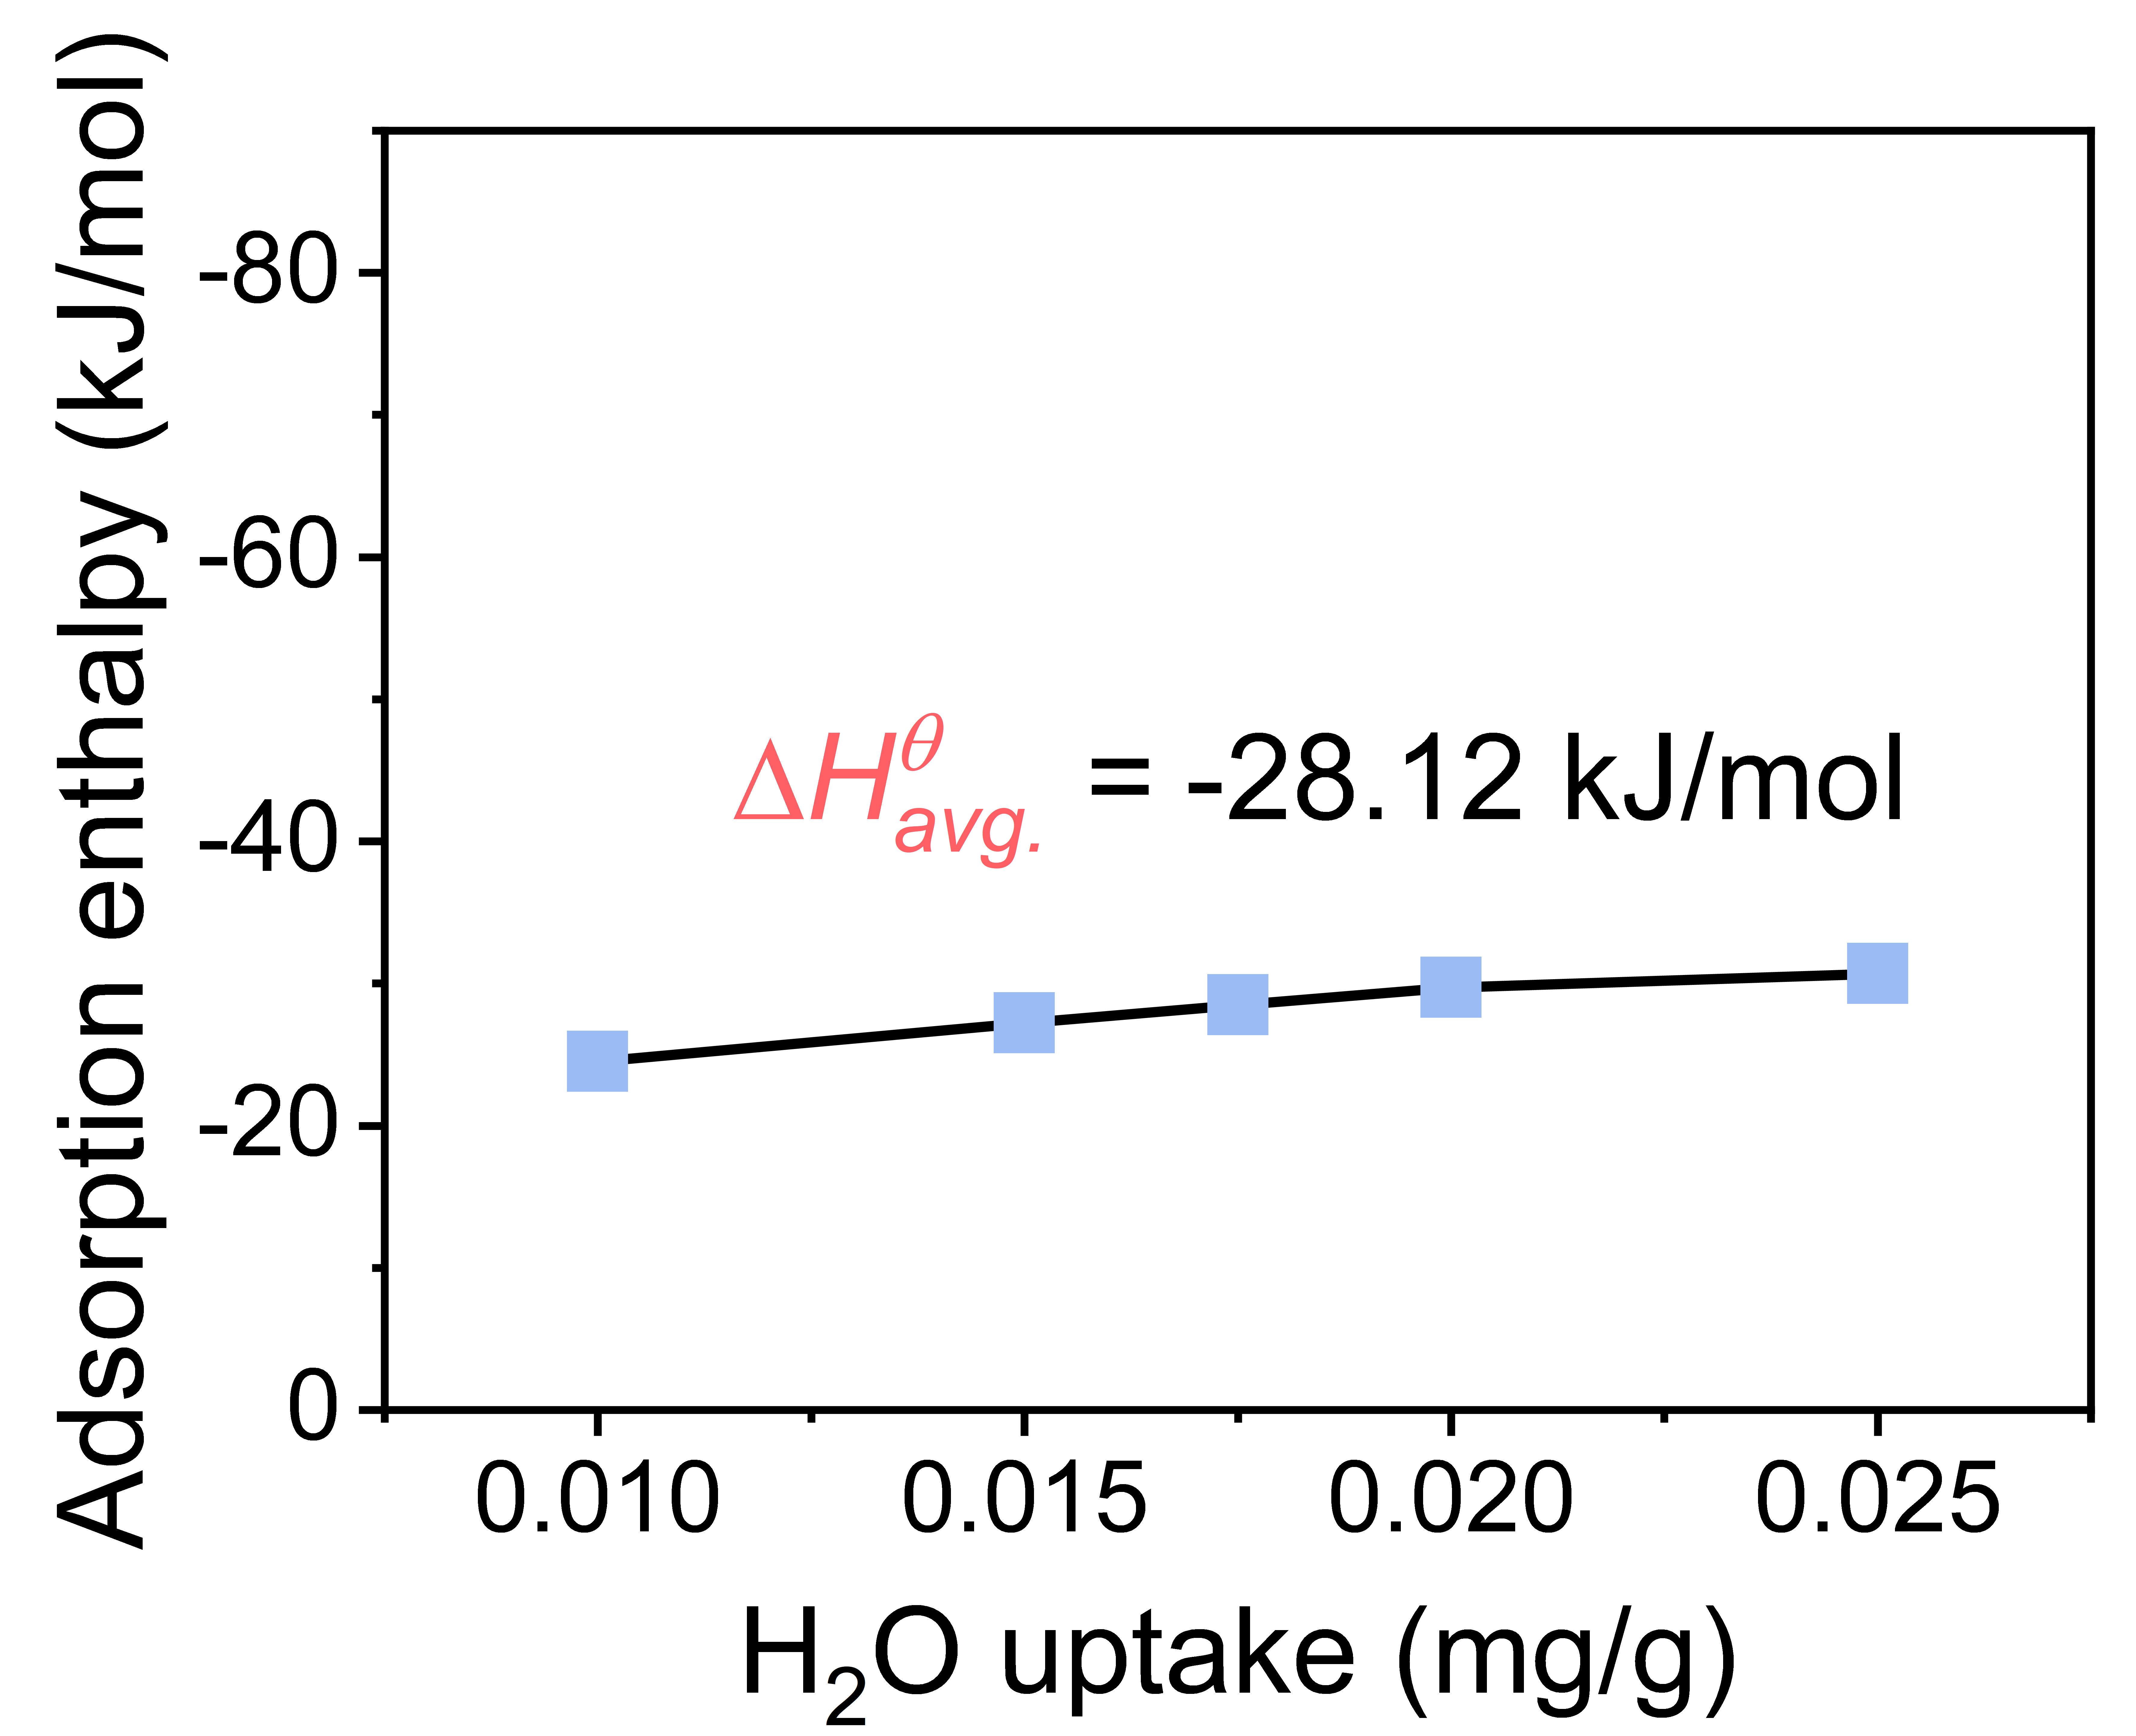


**Figure. S10.** Adsorption enthalpy of **Cd-NTP** on water at different adsorption amounts.


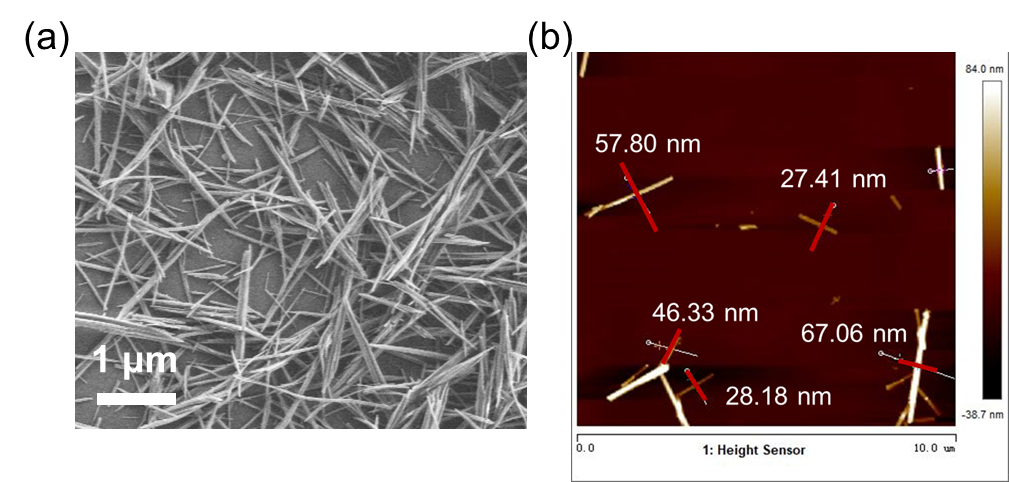
**、**

**Figure. S11.** (a) Scanning electron microscope (SEM) and (b) Atomic Force Microscope (AFM) image of **Cd-NTP** nanowires.


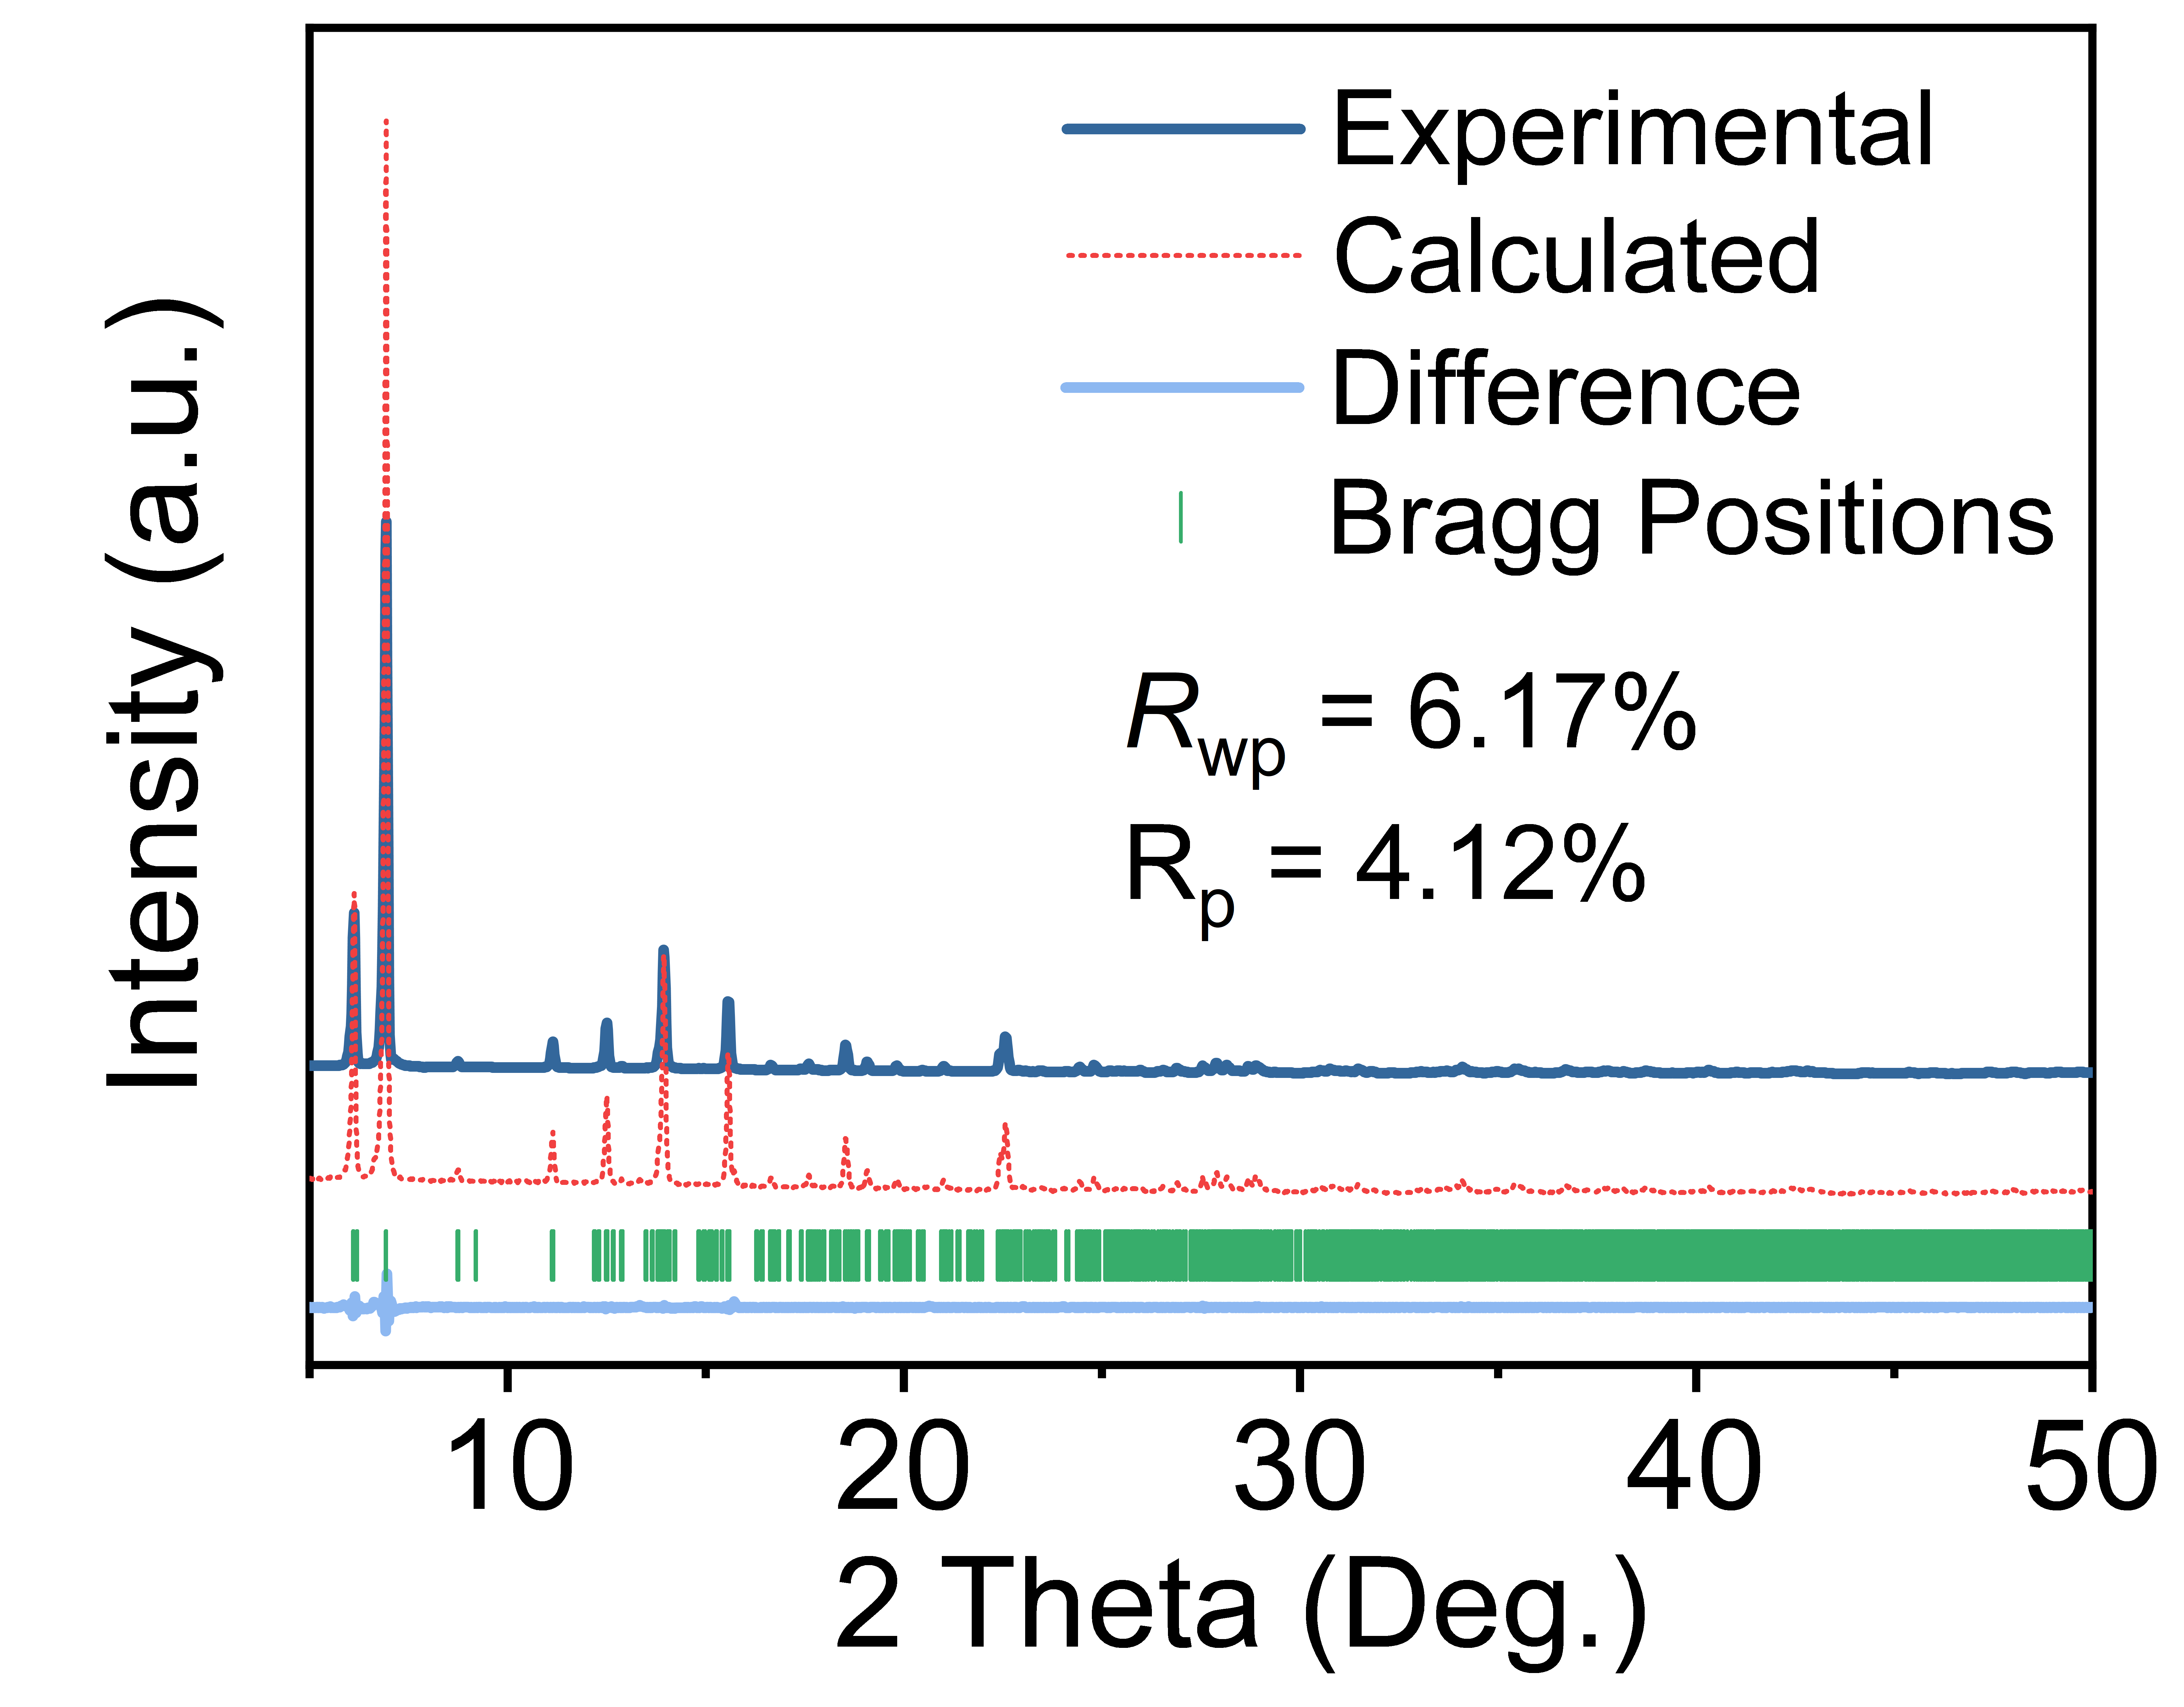


**Figure. S12.** Powder X-ray diffraction (PXRD) pattern of **Cd-NTP**.


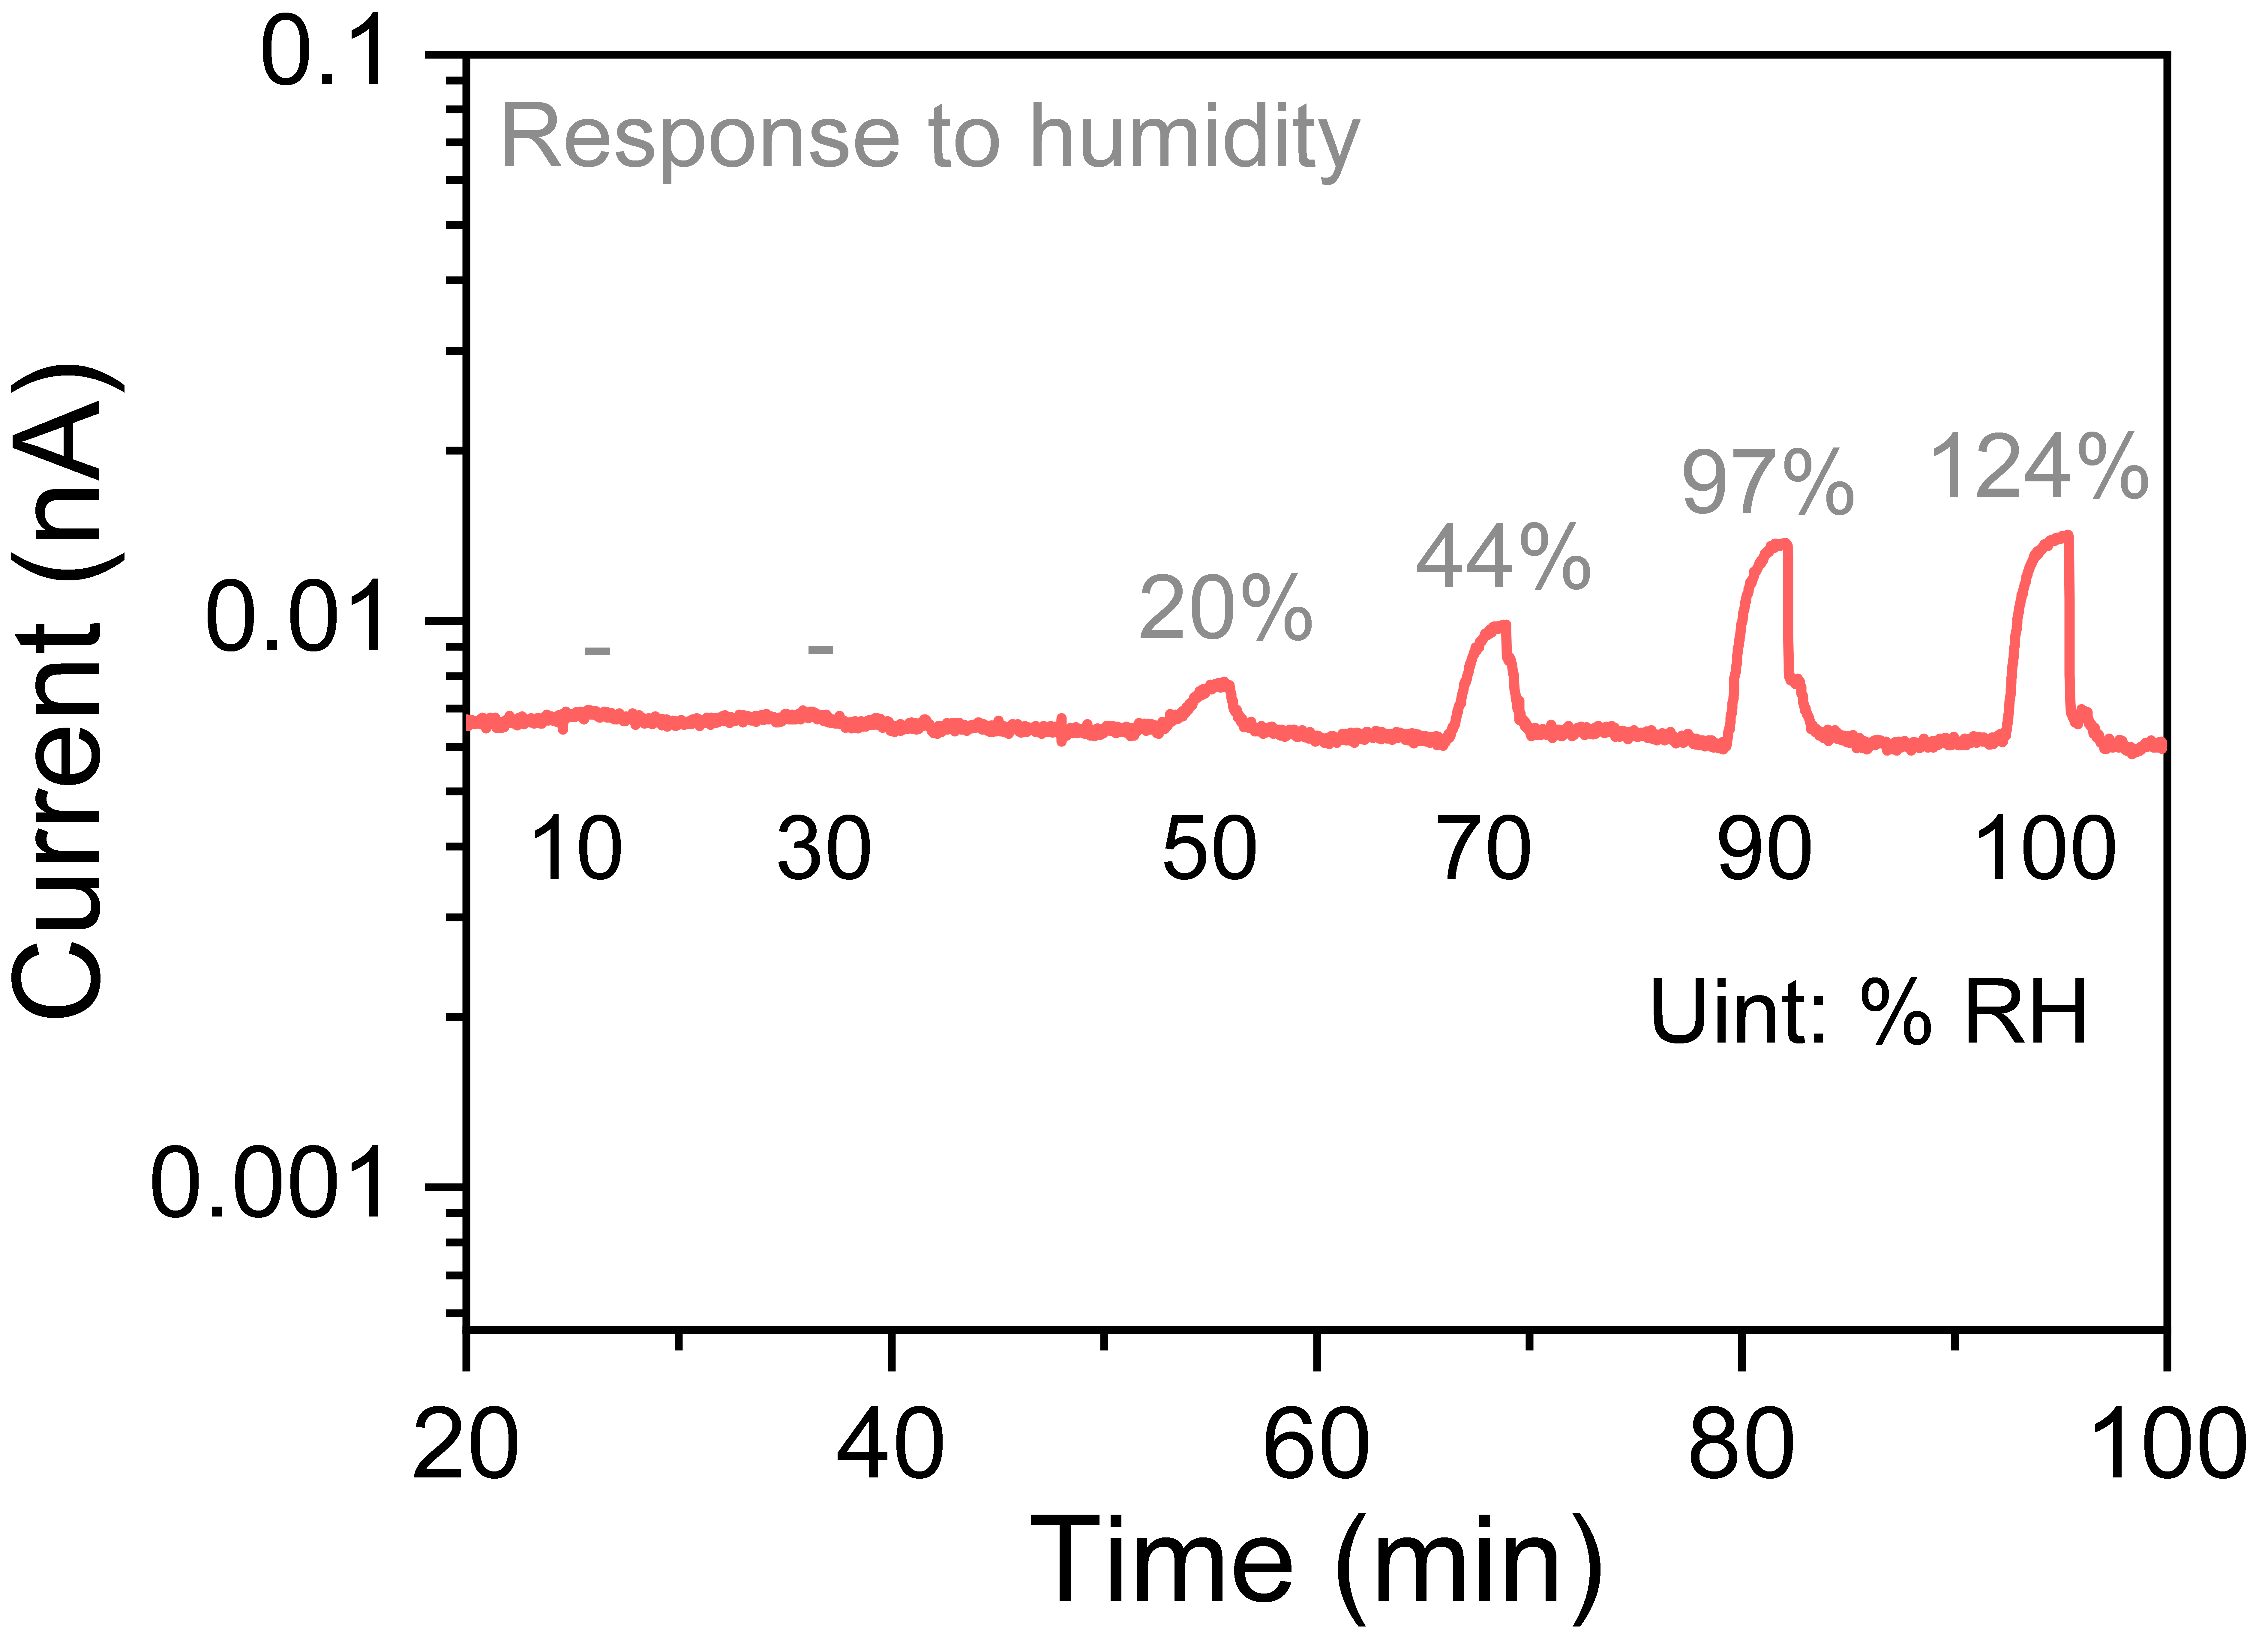


**Figure. S13.** Humidity sensitivity test of **Cd-NTP**.


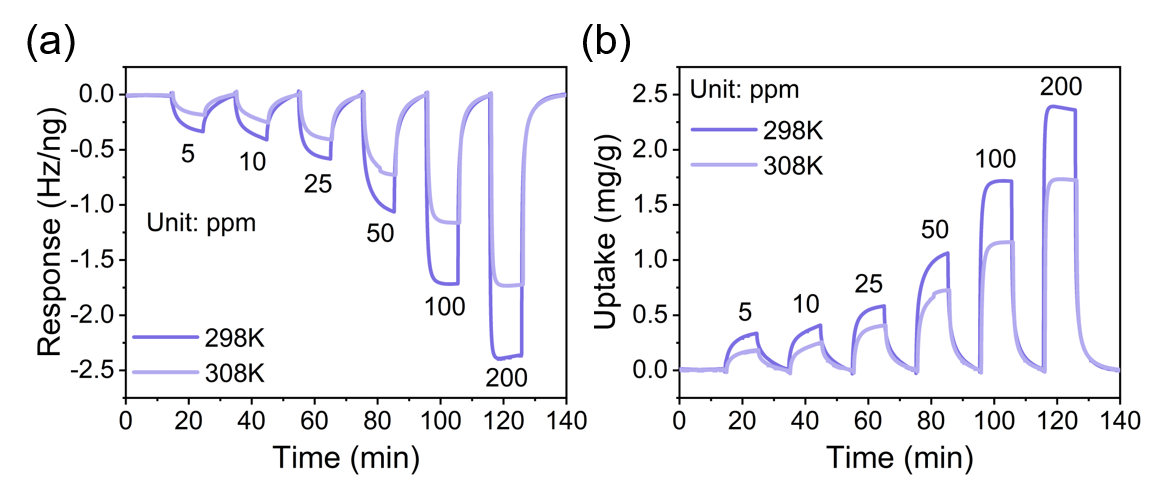


**Figure. S14.** Resonant microcantilever measurements of **Cd-NTP**: (a) response to NH3 and (b) corresponding uptake at 298 K and 308 K.


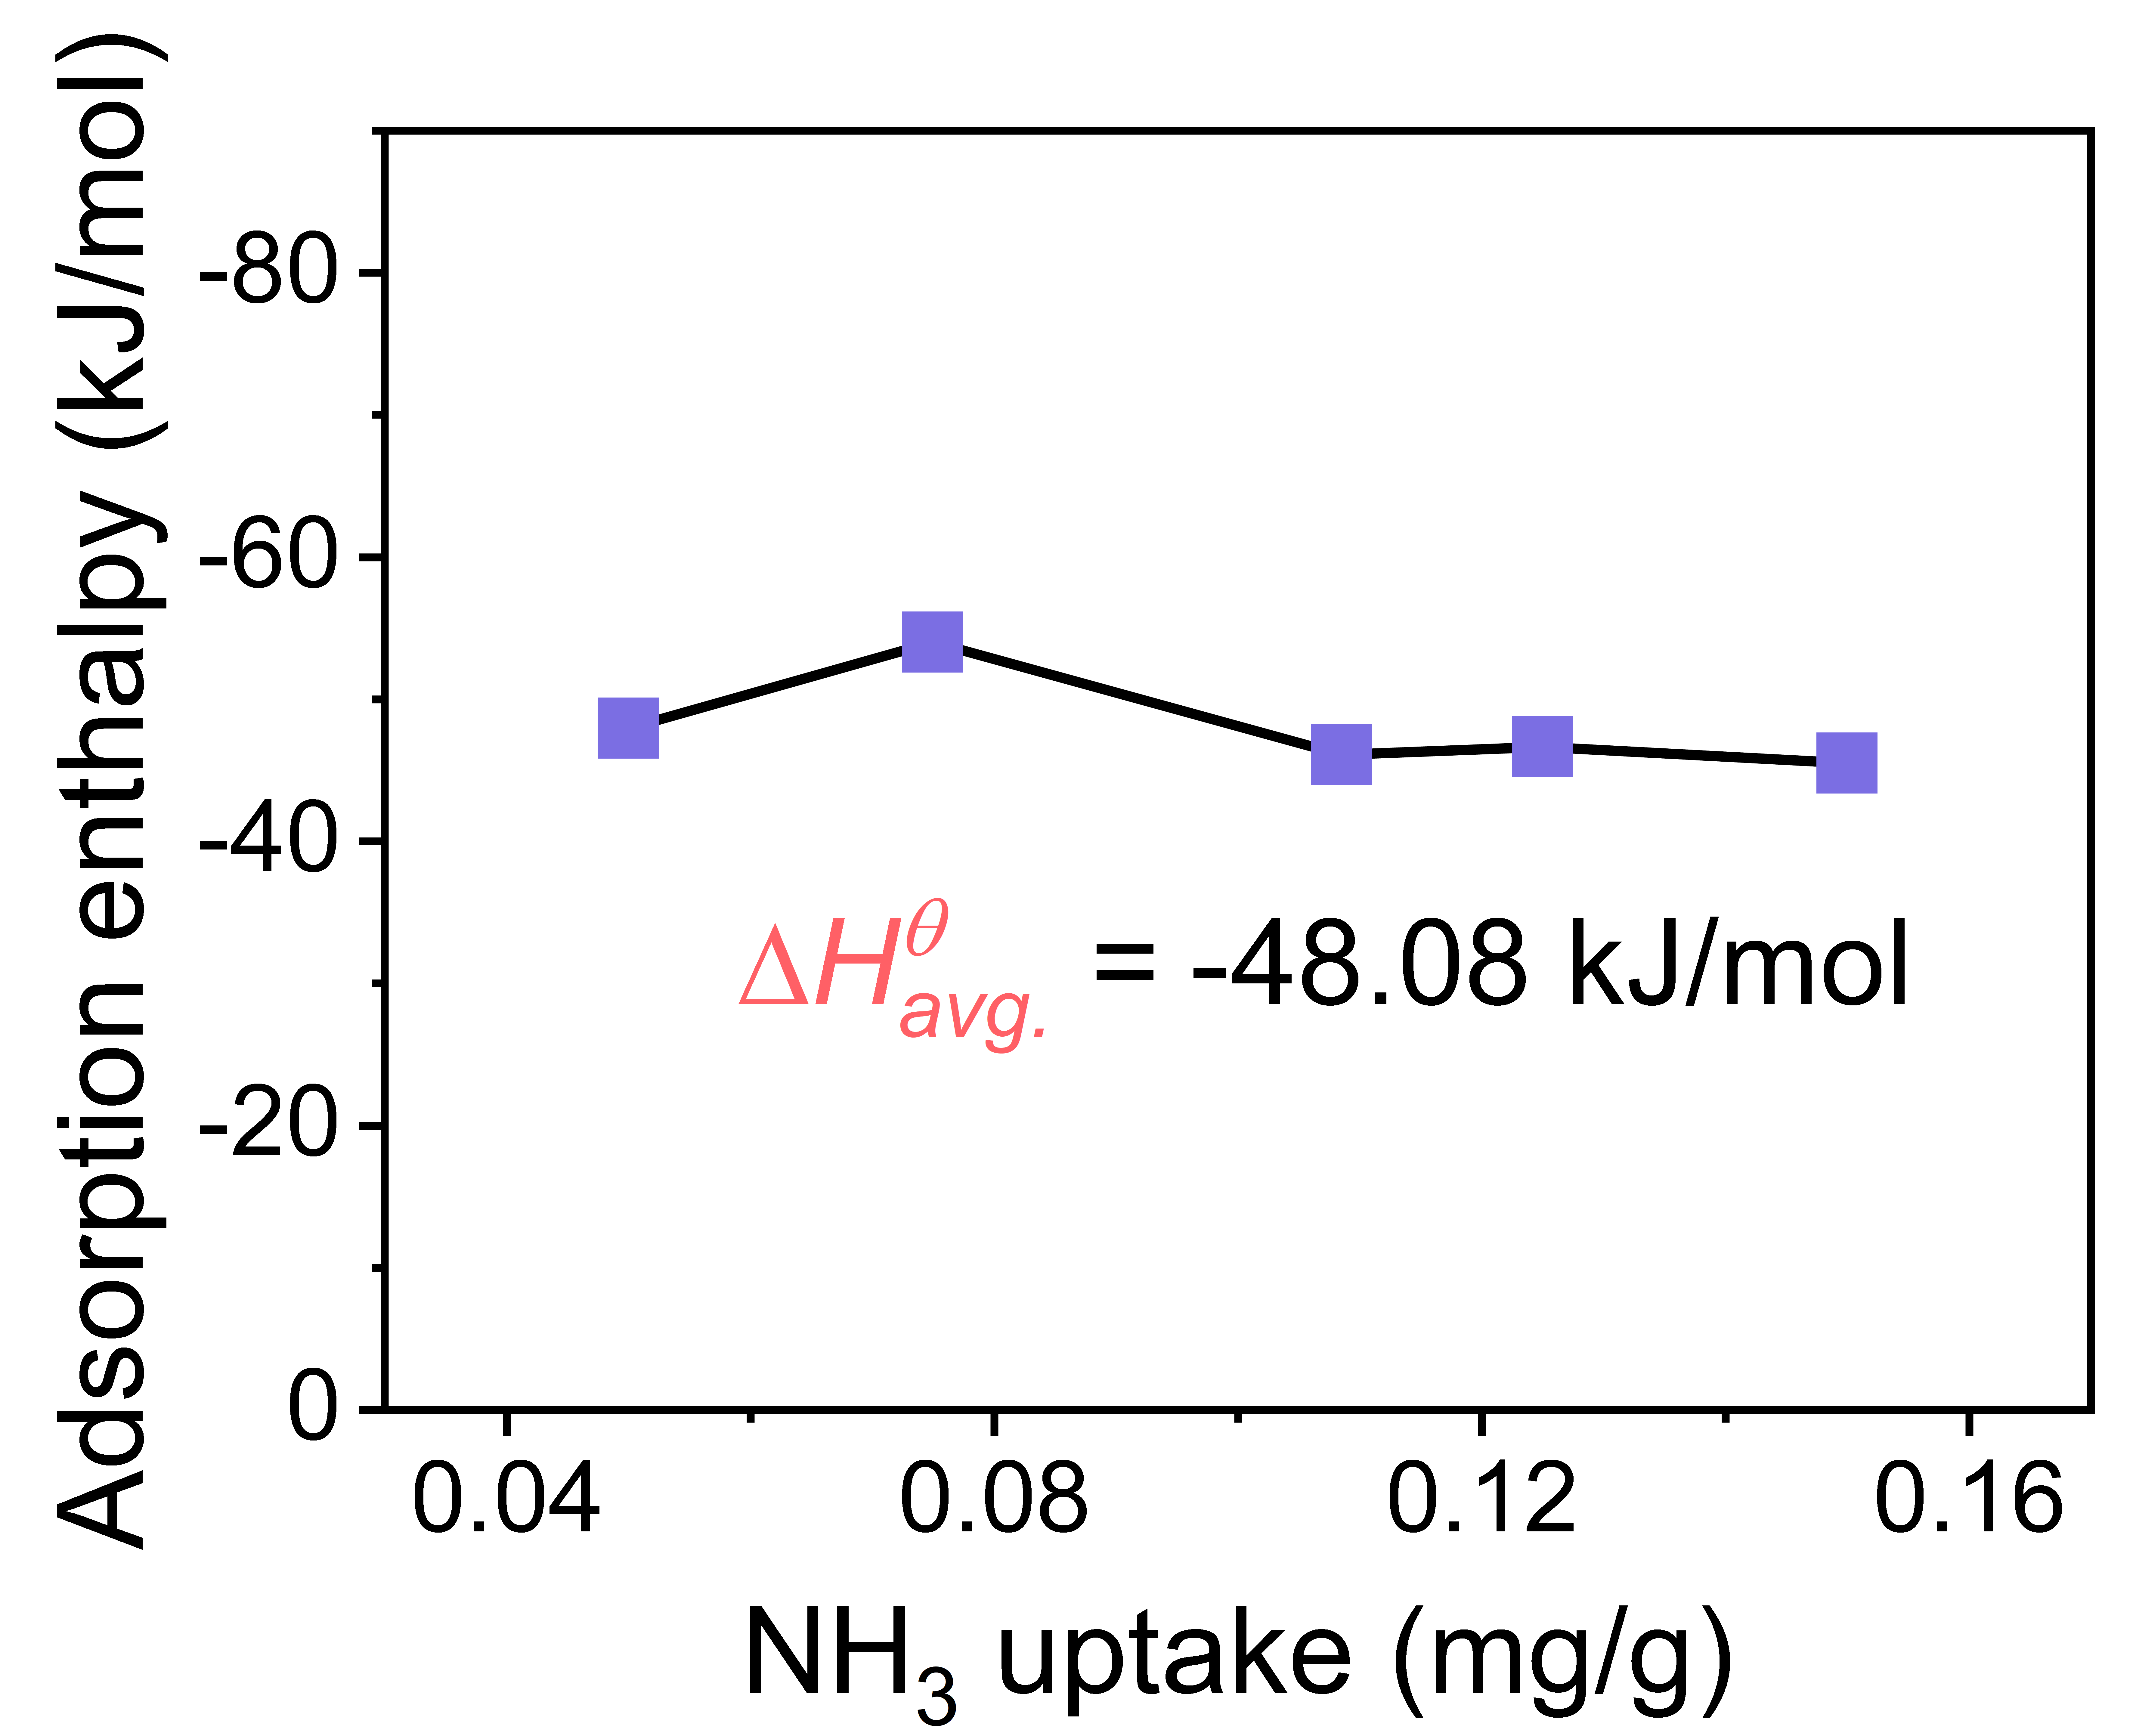


**Figure. S15.** Adsorption enthalpy of **Cd-NTP** on NH3 at different adsorption amounts.


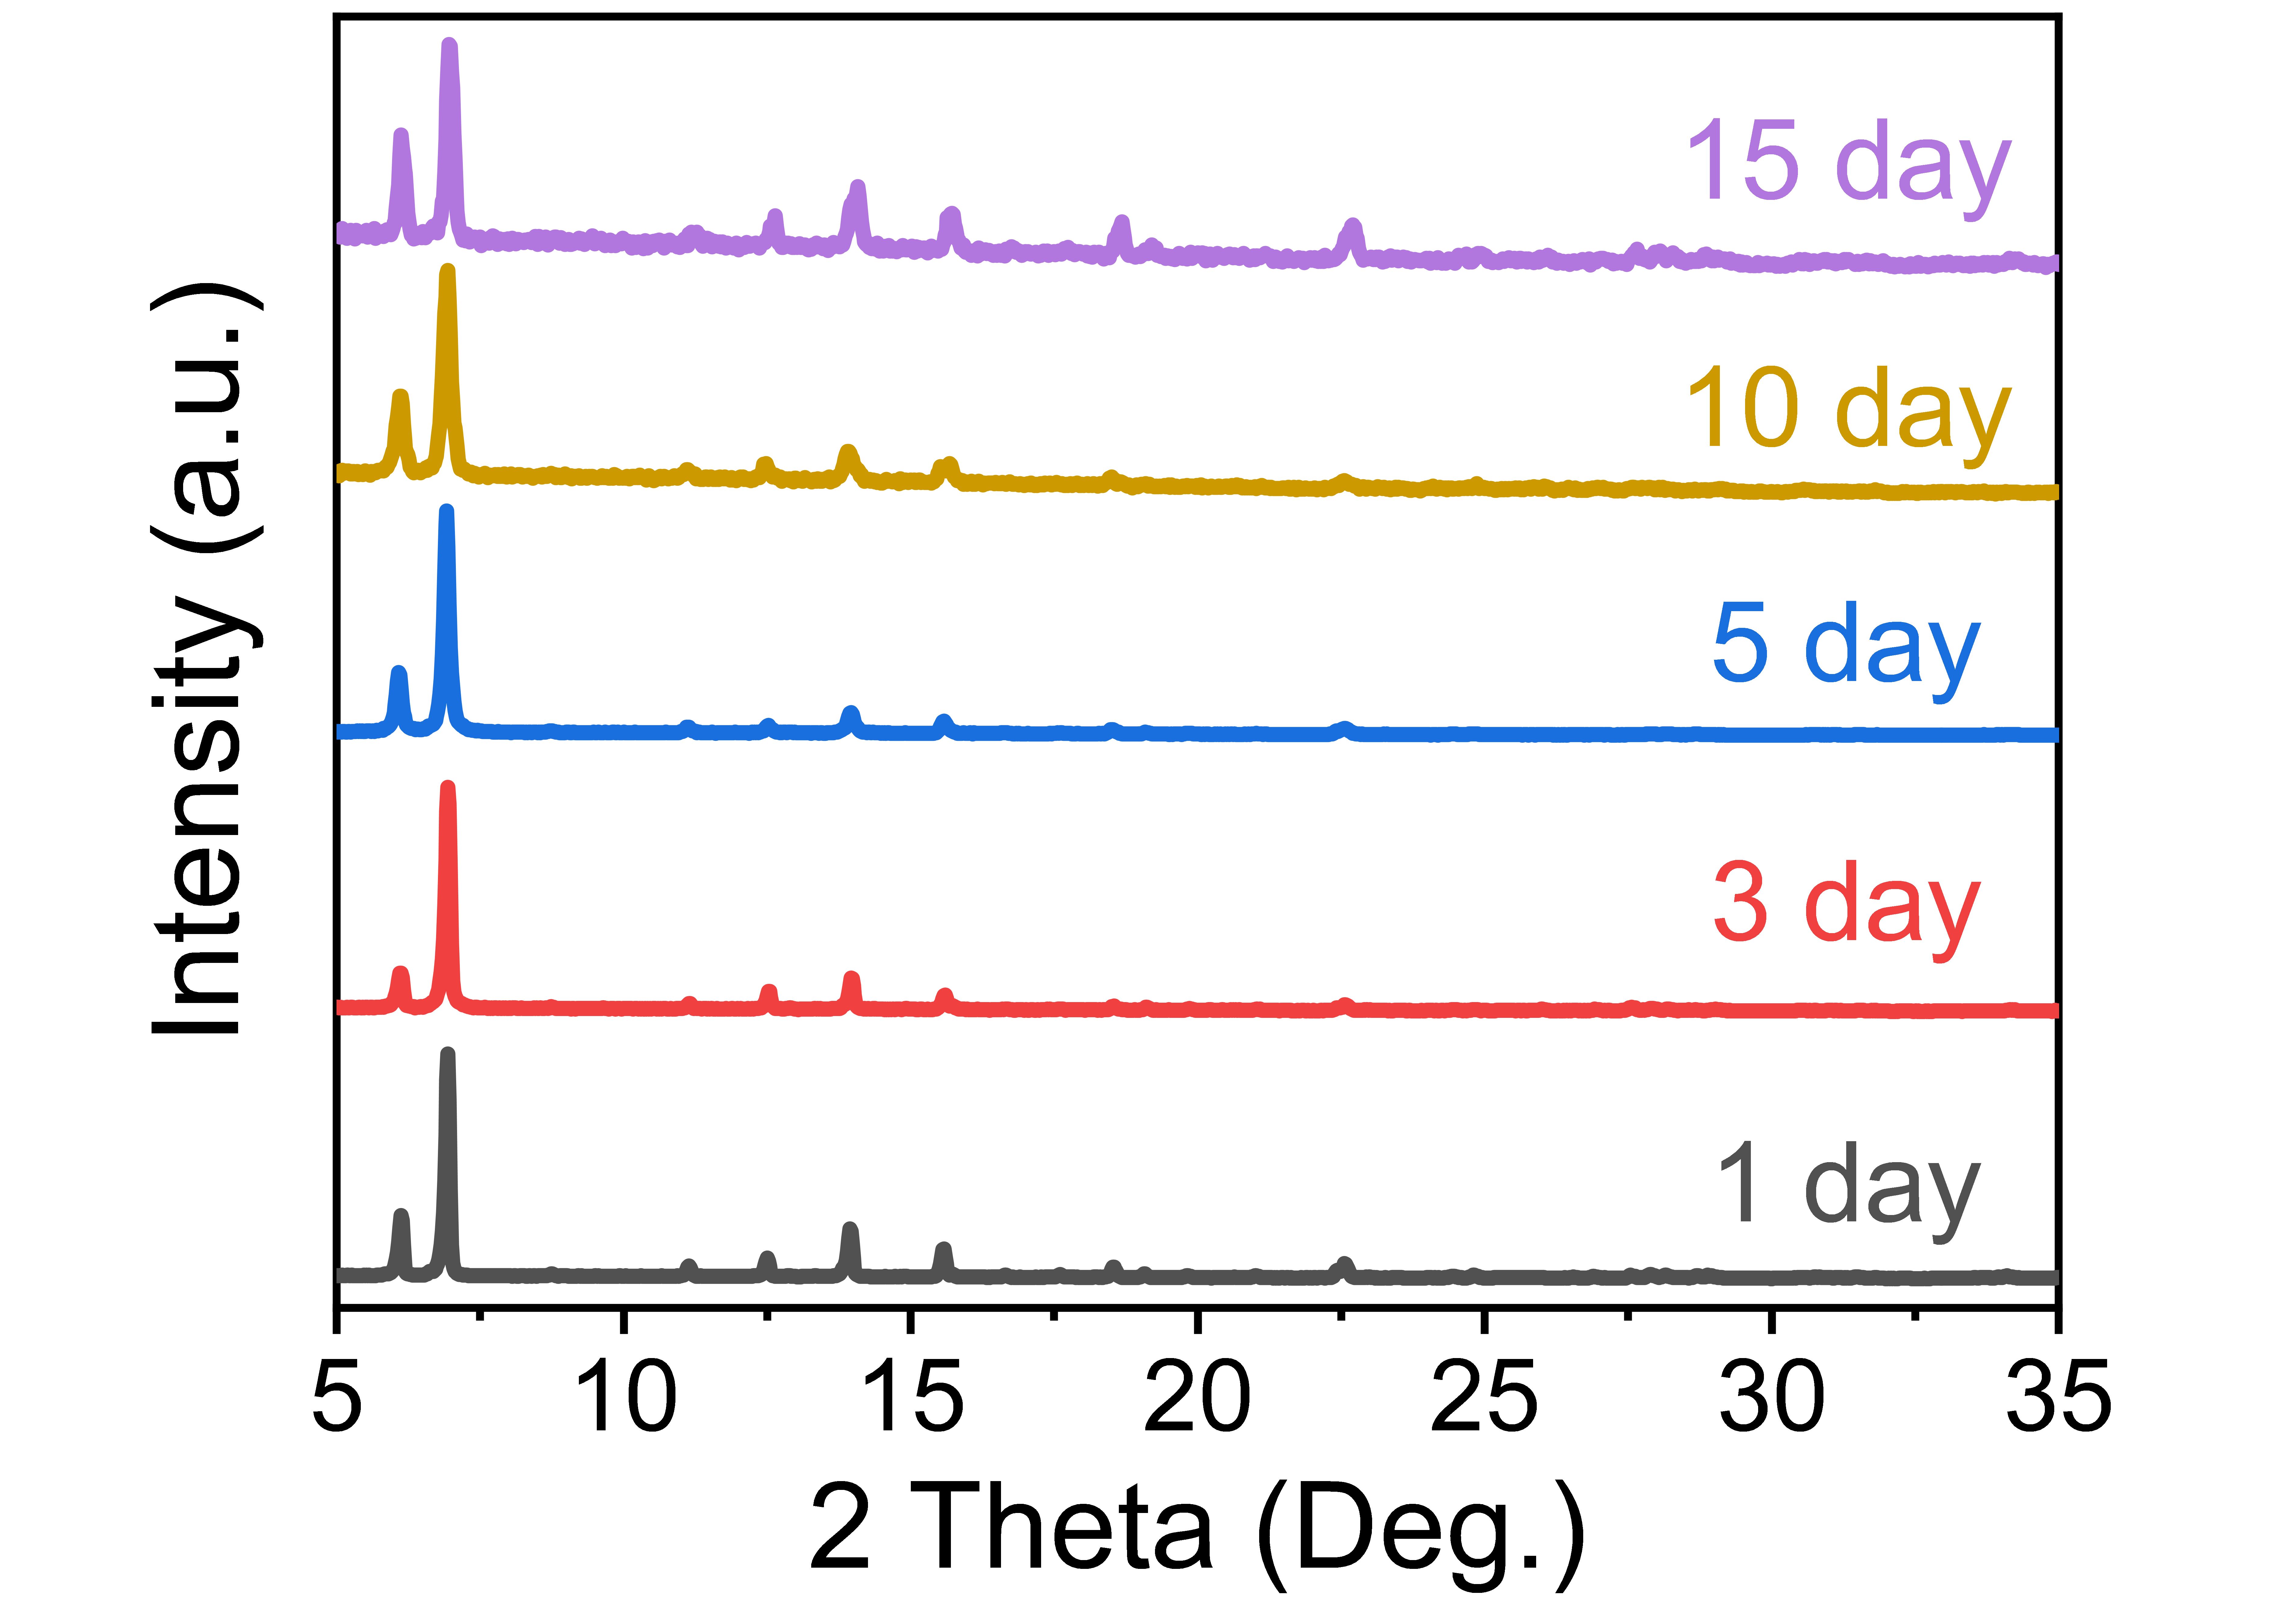


**Figure. S16.** PXRD of **Cd-NTP** after exposure to NH3.


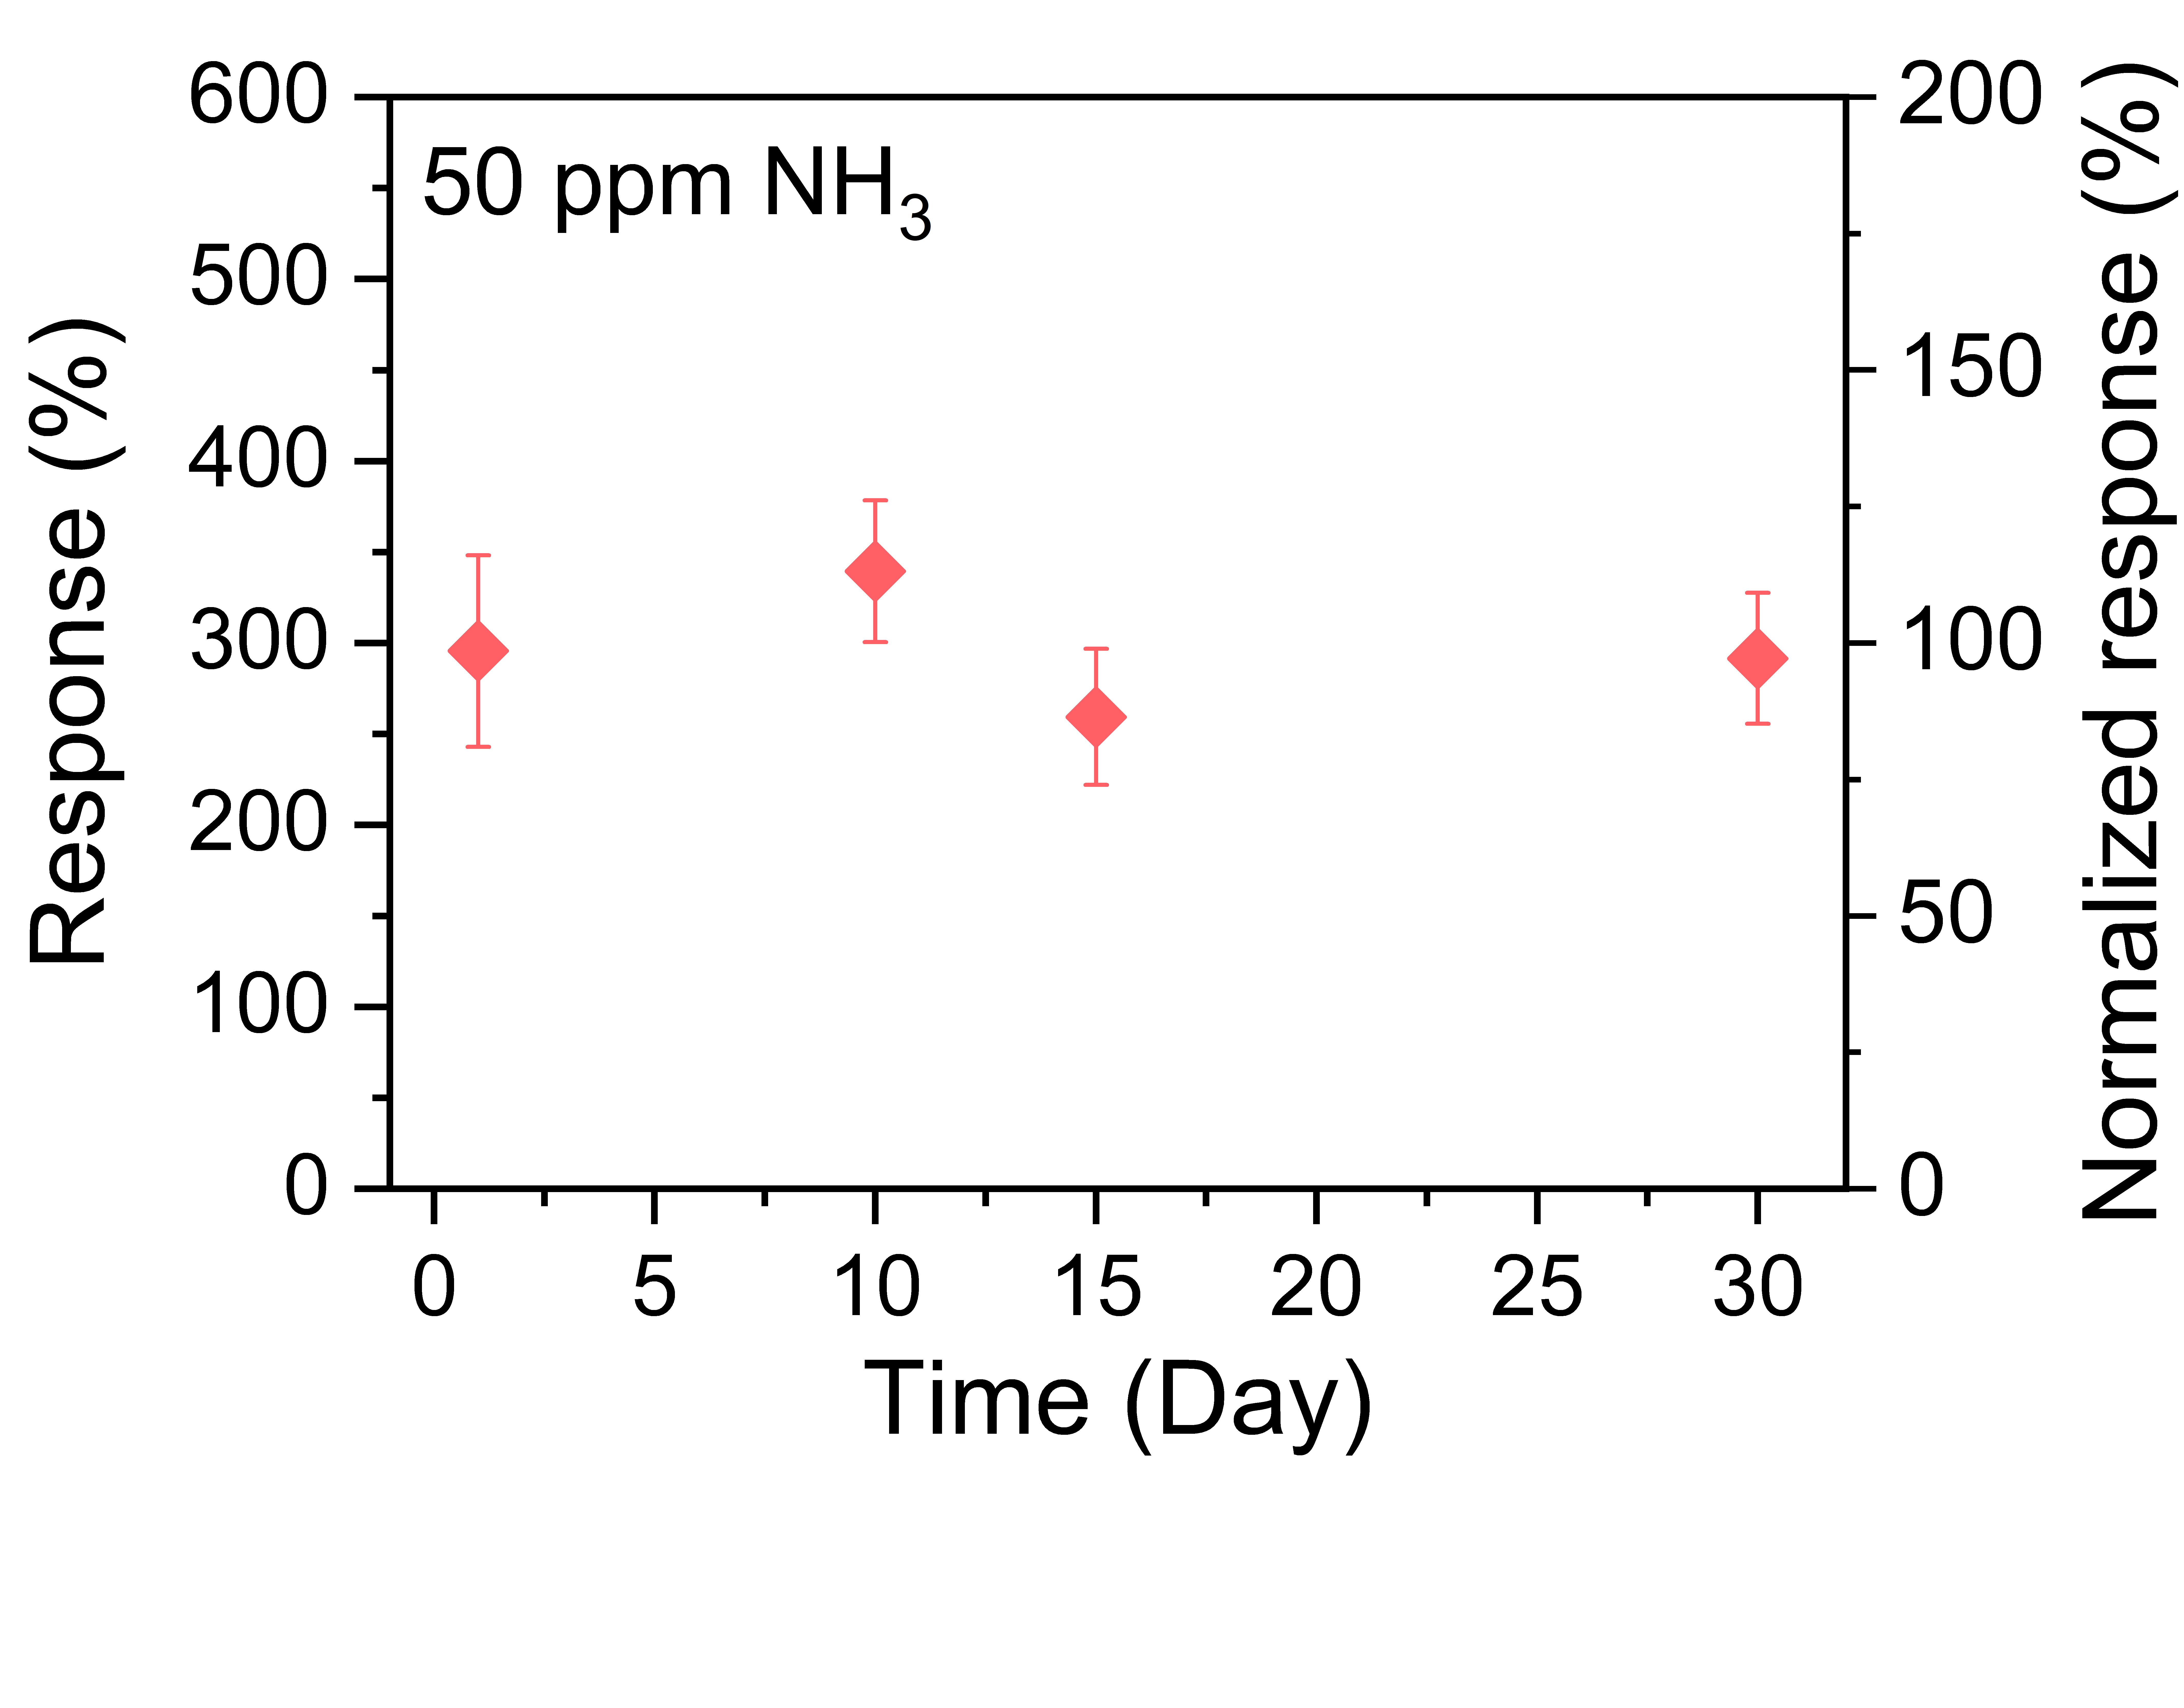


**Figure. S17.** Long-term stability of **Cd-NTP** device to 50 ppm NH3.


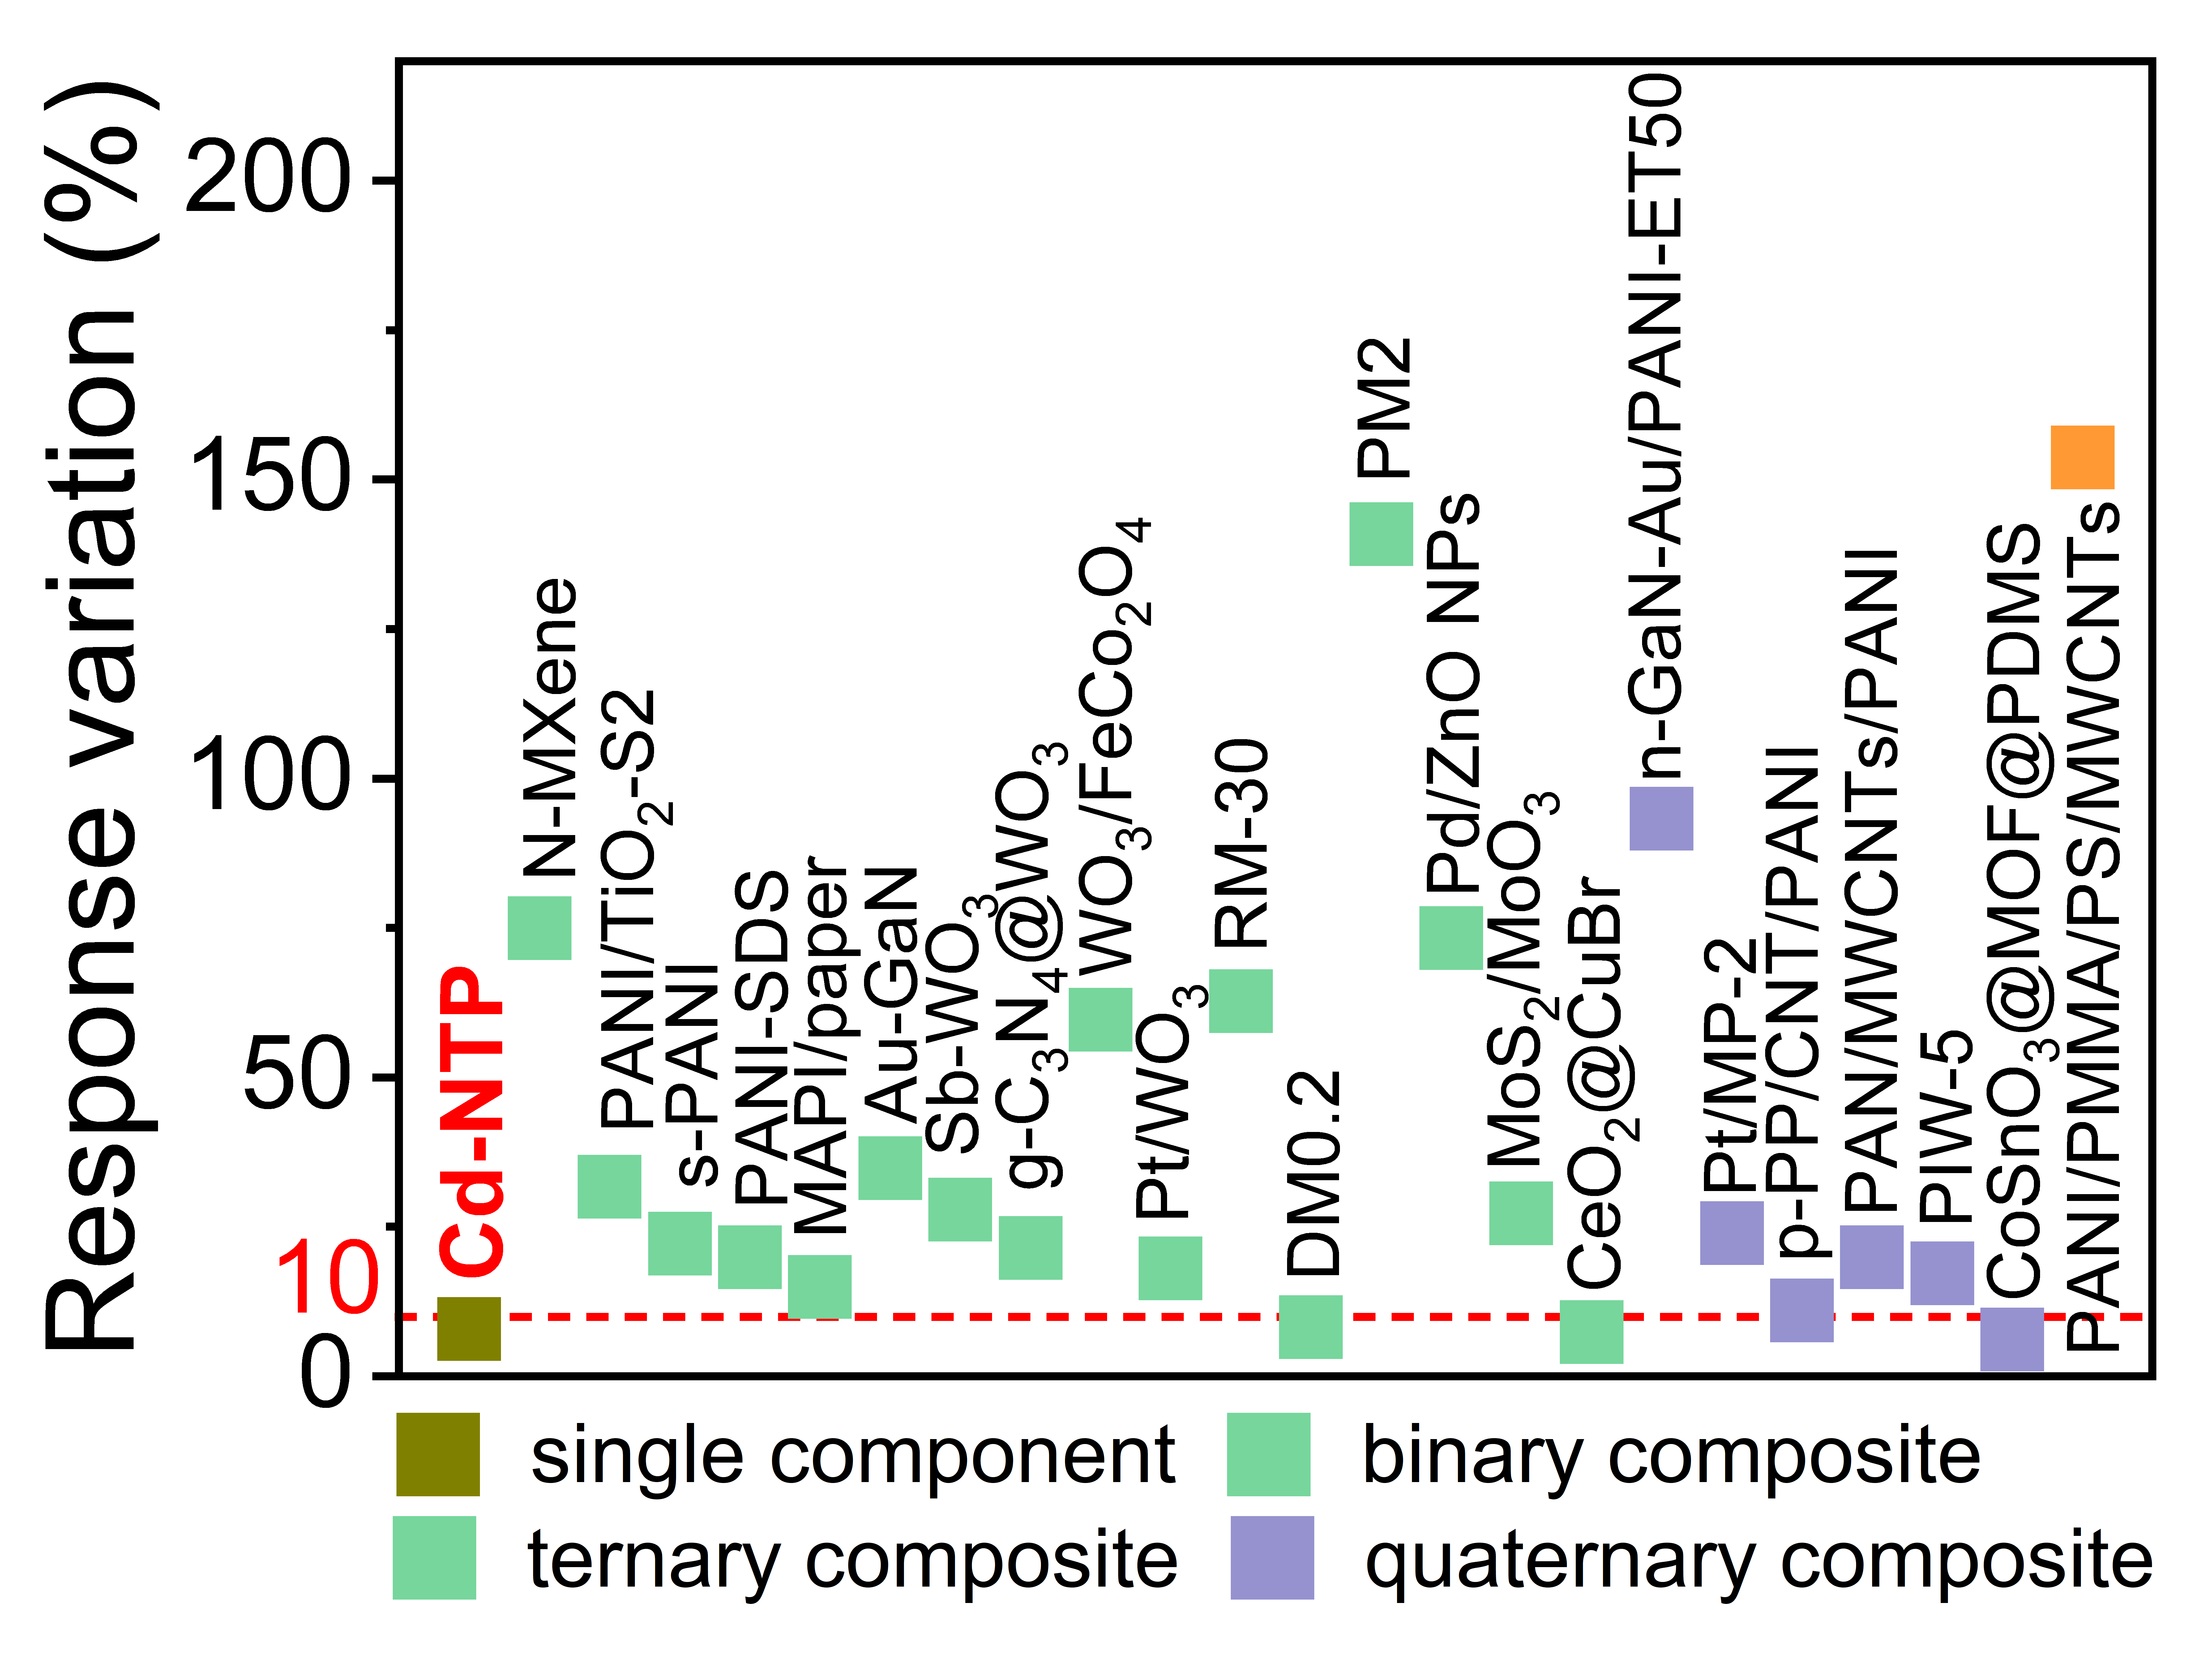


**Figure. S18.** Ammonia response variation of different moisture-resistant materials under humidity3-25.


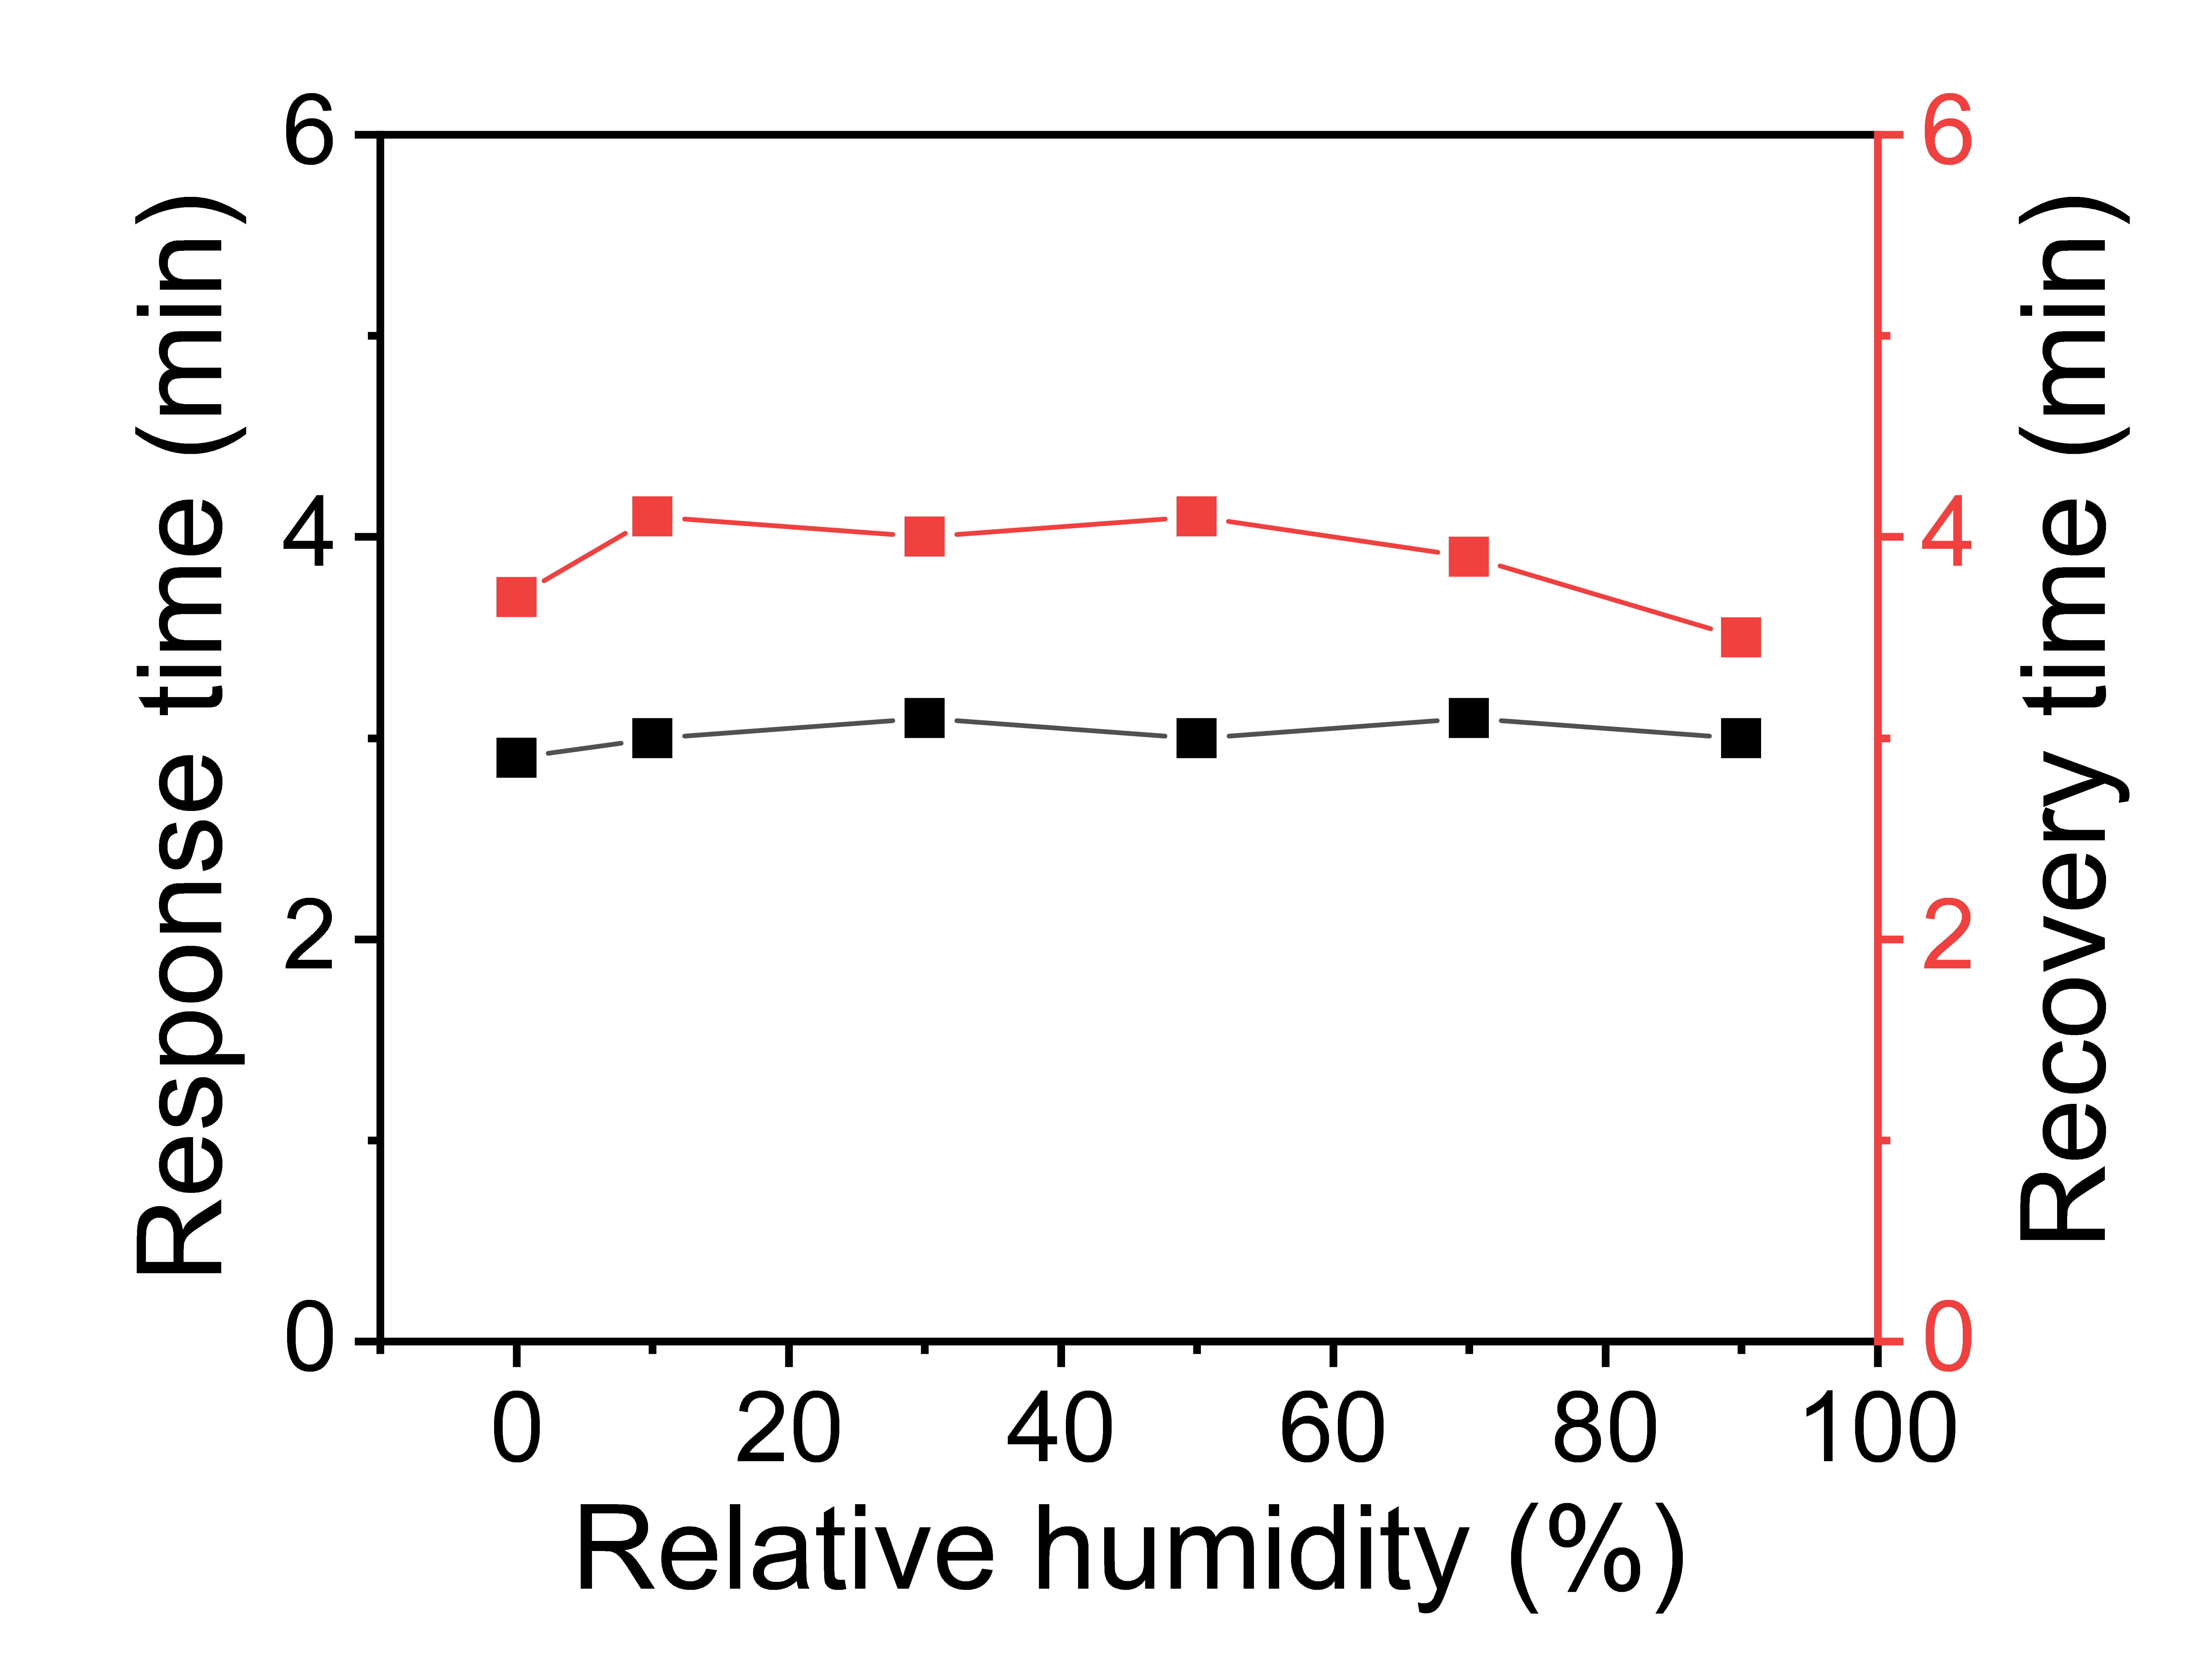


**Figure. S19.** Response and recovery time of **Cd-NTP** to ammonia at different humidity (calculated as the time to reach 90% response or recovery).


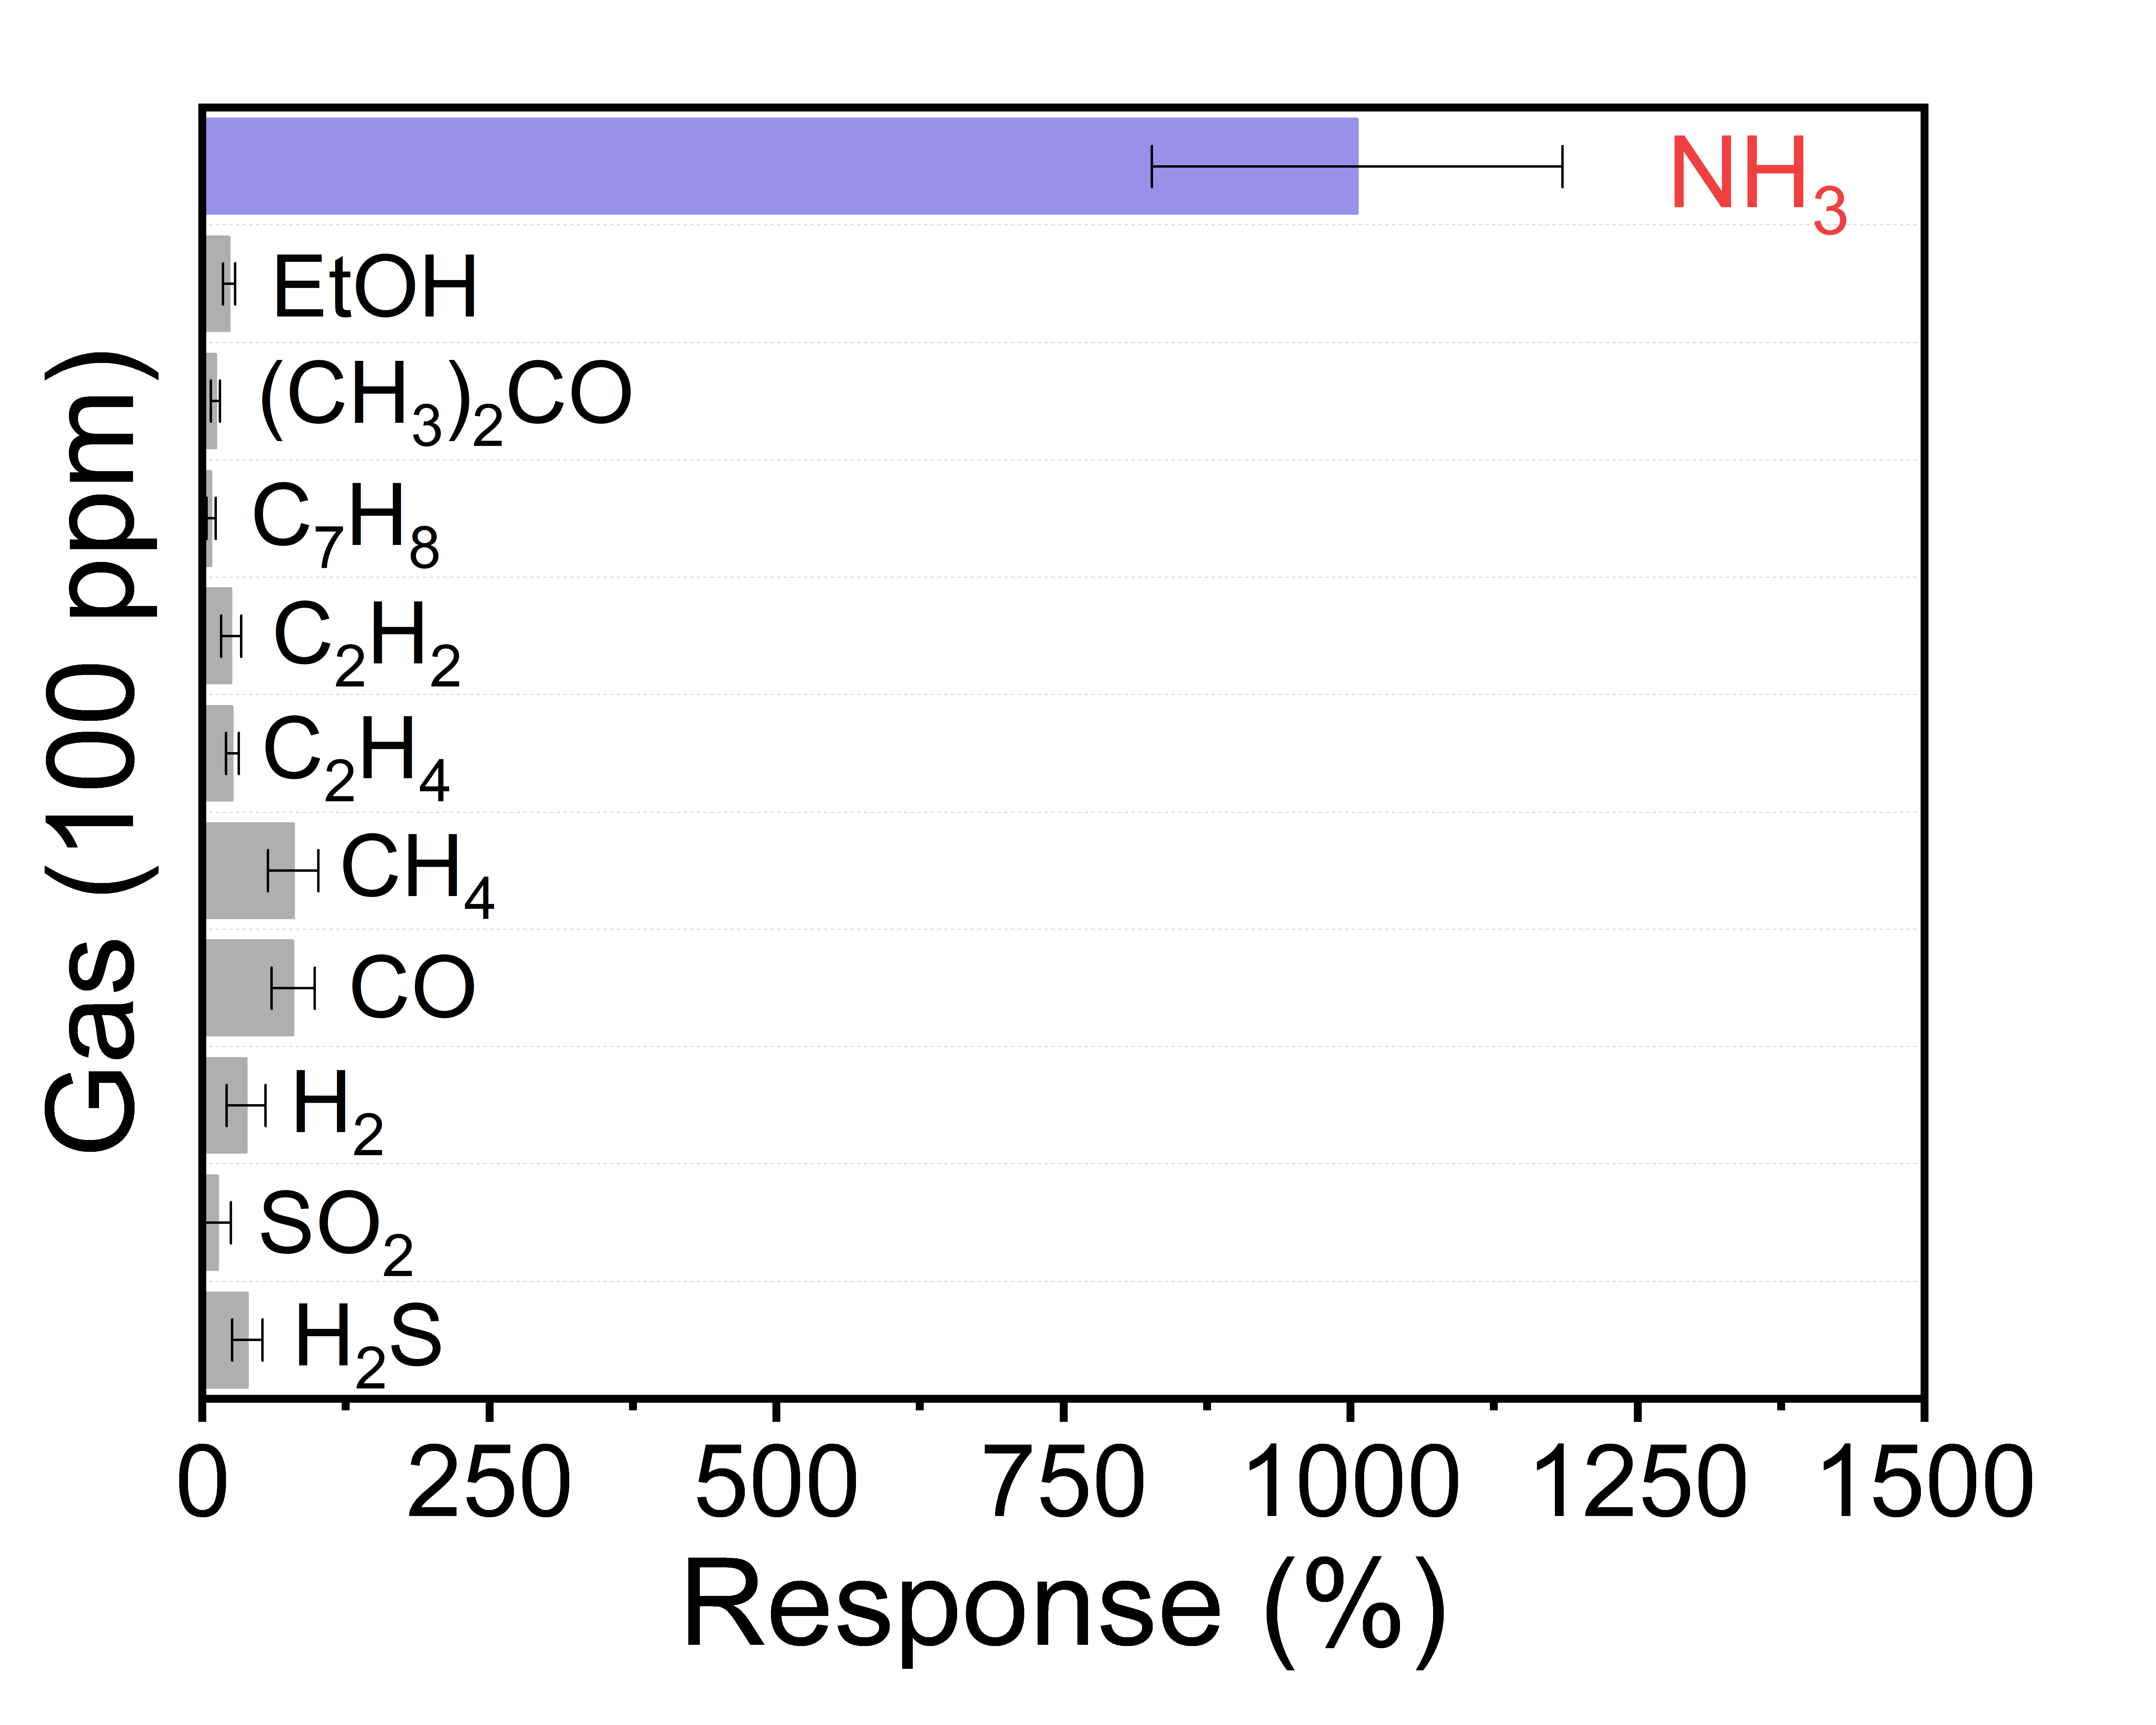


**Figure. S20.** A response comparison of **Cd-NTP** towards NH3 and interfering gases of 100 ppm.


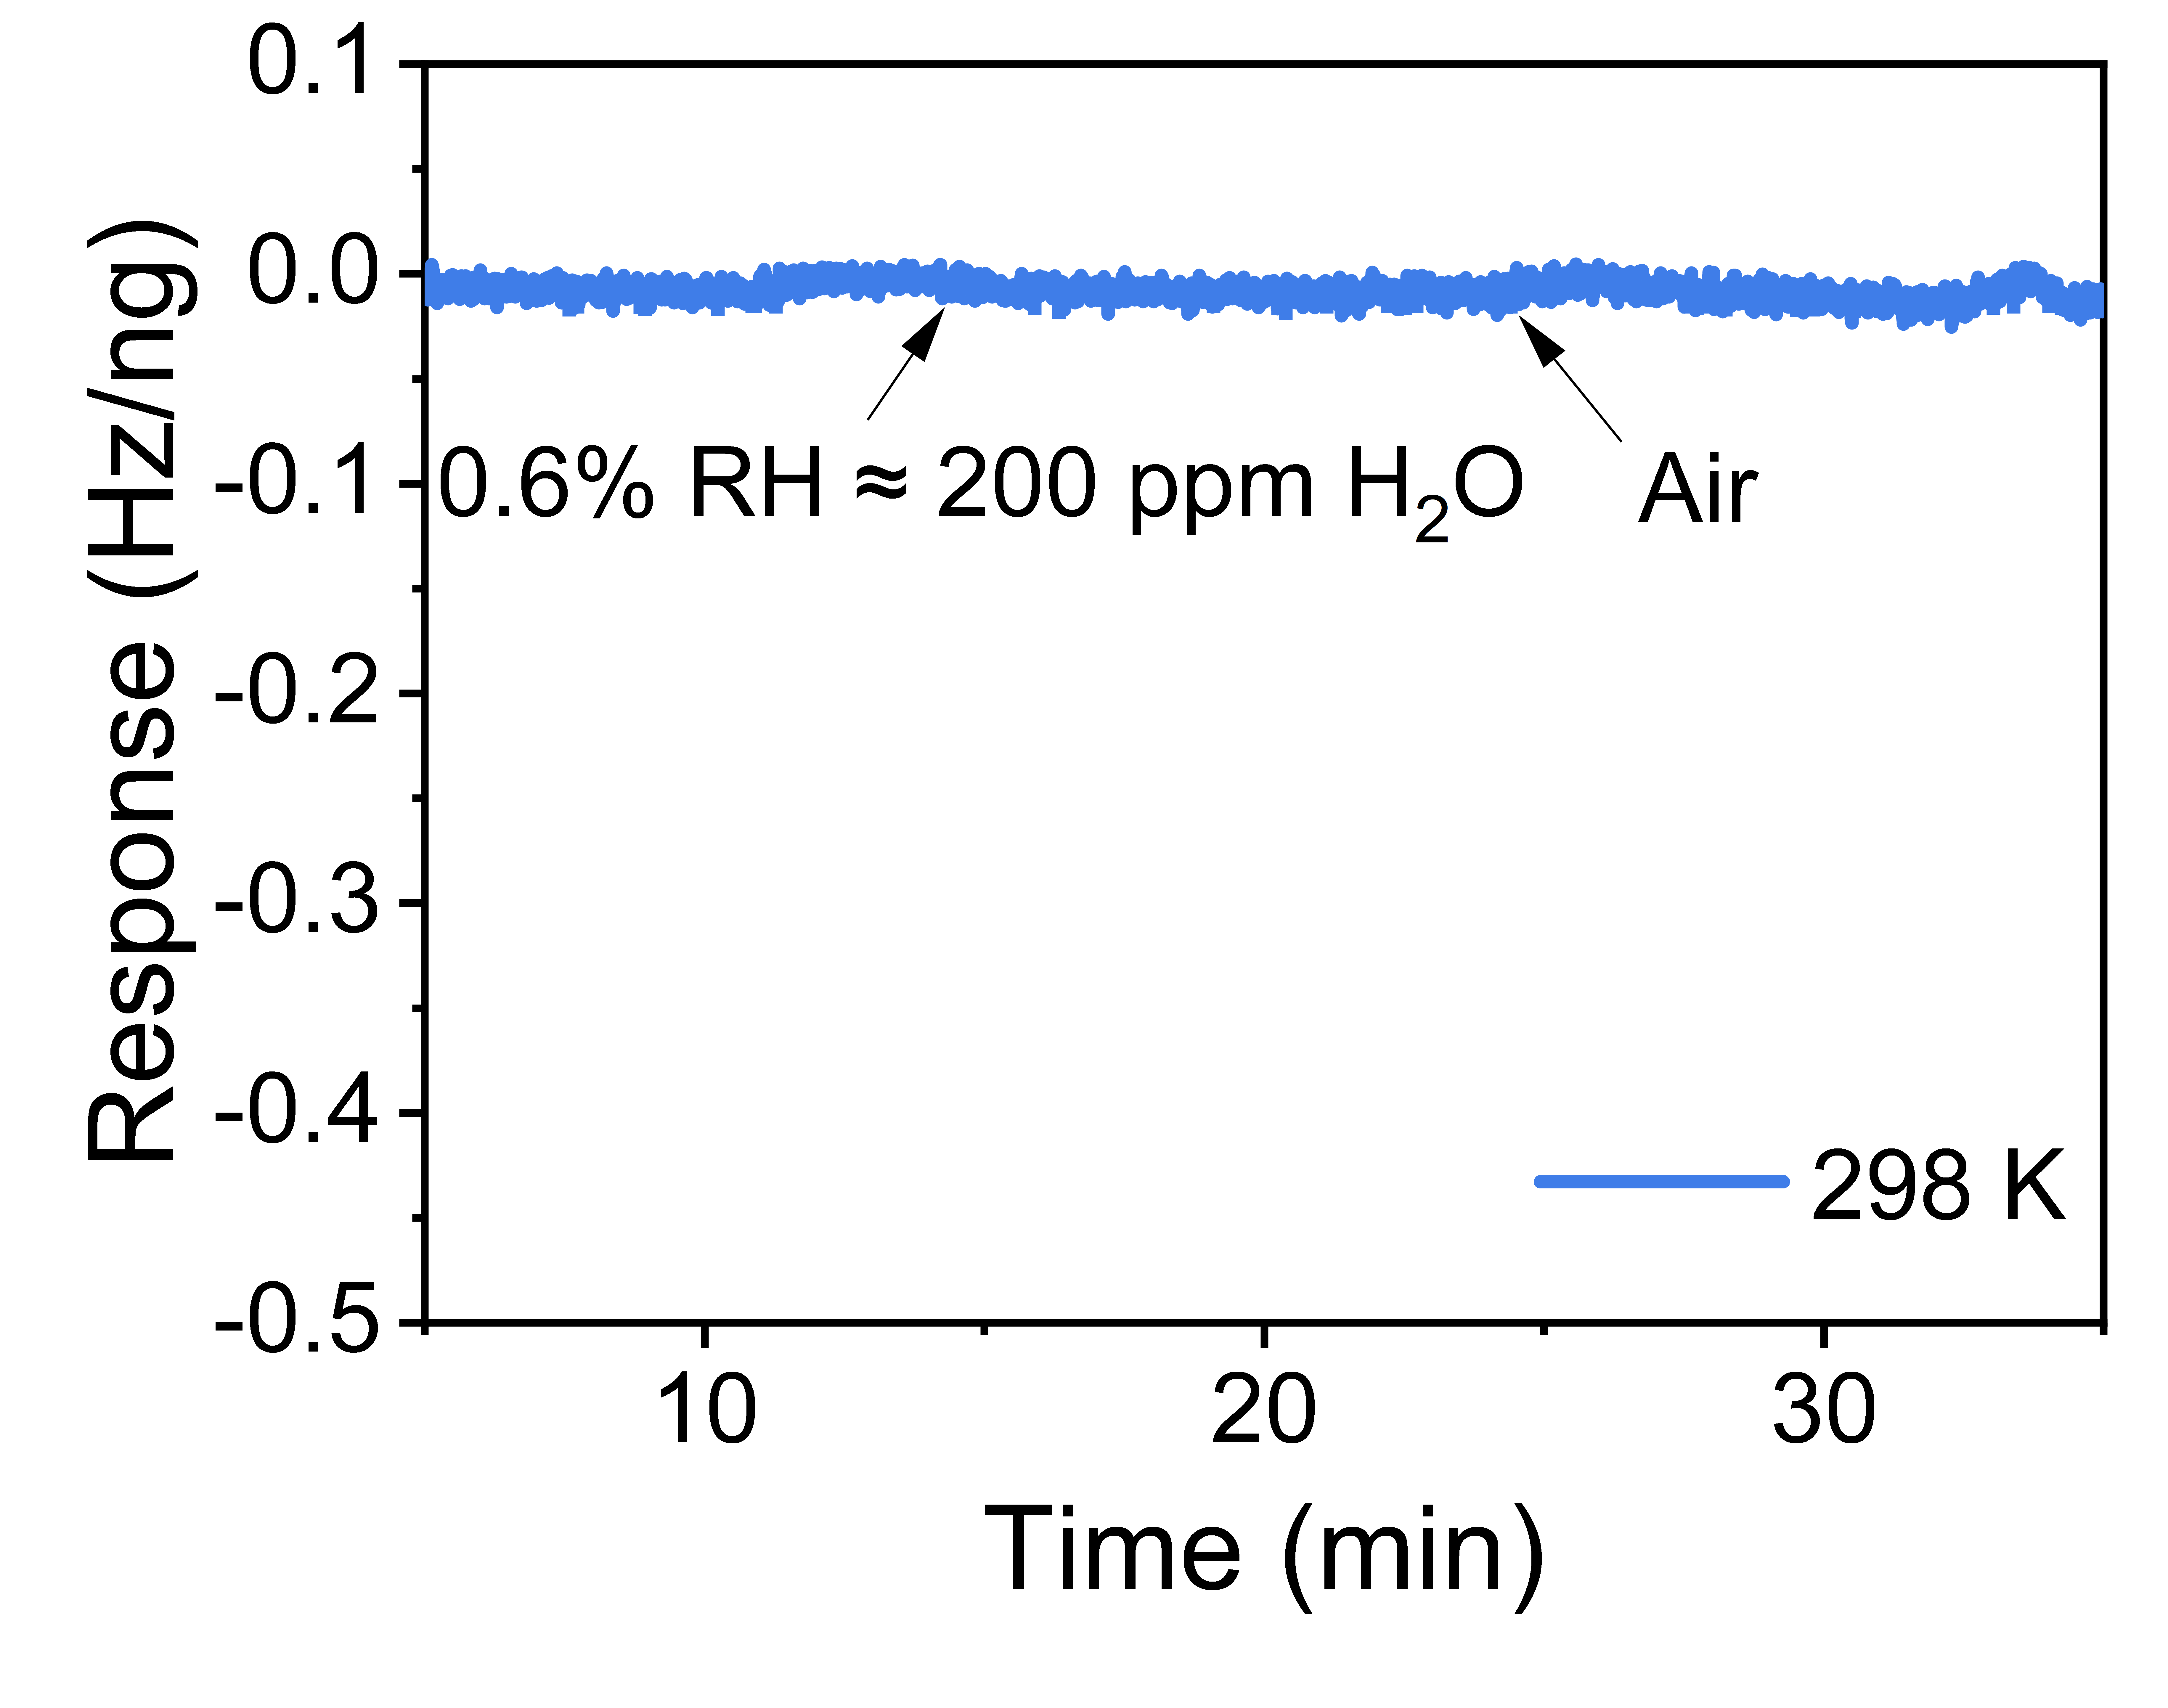


**Figure. S21.** Quantitative capacity measurements of **Cd-NTP** towards 200 ppm H2O.


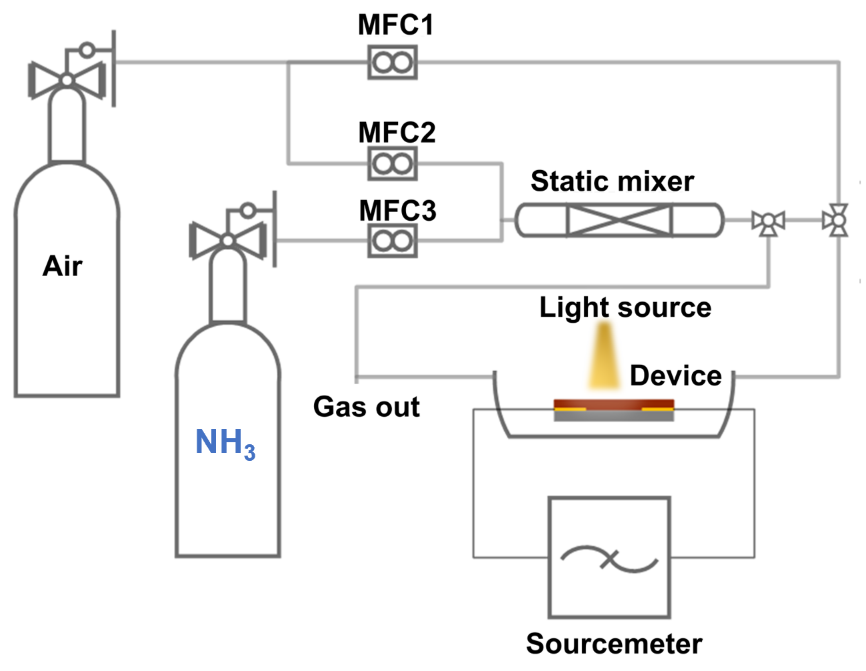


**Figure. S22.** Homemade gas sensing test system.

**Table S1.** High-symmetry k-point coordinates in the Brillouin zone used for the band-structure calculations of **Cd-NTP**.

| k-point | Coordinates |
| --- | --- |
| Γ | (0, 0, 0) |
| Y | (0, 0.5, 0) |
| S | (0, 0.5, 0.5) |
| Z | (0, 0, 0.5) |
| R | (0.5, 0, 0.5) |
| U | (0.5, 0.5, 0.5) |
| T | (0.5, 0.5, 0) |
| X | (0.5, 0, 0) |

**Table S2.** Calculated and measured (with EA and ICP-AES) elemental mass percentage of **Cd-NTP**.

| Element | Calculated weight percentage/% | measured weight percentage/% |
| --- | --- | --- |
| Cd | 26.2 | 26.8 |
| C | 33.5 | 33.1 |
| S | 14.9 | 14.6 |
| N | 6.5 | 6.4 |
| H | 2.1 | 2.3 |

**Table S3.** Reported NH3 gas-sensing materials working at room temperature.

| Materials | Response range (ppm) | | Concentration (ppm) | Response value (%) | | Ref. |
| --- | --- | --- | --- | --- | --- | --- |
| **Cd-NTP** | **10**–**1000** | **100** | | **852** | **This work** | |
| FZU-2 | 0.01–1 | 100 | | 1200 | 26 | |
| NDI-A | 2–50 | 50 | | 66 | 27 | |
| NiPc-Cu | 2–80 | 40 | | 29 | 28 | |
| Cu-BHT | 1–100 | 100 | | 15 | 29 | |
| Cu3HHTT2 | 5–60 | 60 | | 5500 | 30 | |
| ST-2BP | 1–40 | 20 | | 787 | 31 | |
| Cu-HHTP | 0.005–100 | 100 | | 161 | 32 | |
| CuTCNQ | 10–99 | 99 | | 5 | 33 | |
| Cu3HITP2 | 0.5–10 | 10 | | 3 | 34 | |
| rGO | 5–40 | 40 | | 22 | 35 | |
| MnO2 | 1–100 | 100 | | 20 | 36 | |
| Dy2O3 | 0.1–100 | 100 | | 1337 | 37 | |
| MoS2 | 0.3–30 | 8 | | 30 | 38 | |
| Cu(HHTP)(THQ) | 1–100 | 10 | | 12 | 39 | |
| Polypyrrole | 0.00005–2 | 2 | | 200 | 40 | |
| pDPPBu-BT | 0.01–1000 | 1000 | | 45 | 41 | |

**Table S4.** Ammonia response variation of different moisture-resistant materials under humidity.

| Materials | Response variation (%) | Concentration of NH3 (ppm) | Number of composite materials | Ref. |
| --- | --- | --- | --- | --- |
| **Cd-NTP** | **8** | **100** | **1** | **This work** |
| FZU-2 | 991 | 1 | 1 | 26 |
| NDI-A | 16.7 | 50 | 1 | 27 |
| NiPc-Cu | 17.3 | 40 | 1 | 28 |
| CuBHT | 49 | 20 | 1 | 29 |
| Cu3HHTT2 | 194 | 60 | 1 | 30 |
| ST-2BP | 11 | 20 | 1 | 31 |
| N-MXene | 75 | 1 | 2 | 3 |
| PANI/TiO2-S2 | 31.8 | 40 | 2 | 4 |
| *s*-PANI | 22.2 | 5 | 2 | 5 |
| PANI-SDS | 20 | 40 | 2 | 6 |
| MAPI/paper | 15 | 20 | 2 | 21 |
| Au-GaN | 34.9 | 100 | 2 | 7 |
| Sb-WO3 | 27.9 | 50 | 2 | 8 |
| g-C3N4@WO3 | 21.5 | 10 | 2 | 9 |
| WO3/FeCo2O4 | 59.7 | 100 | 2 | 10 |
| Pt/WO3 | 18.1 | 1000 | 2 | 11 |
| RM-30 | 62.8 | 10 | 2 | 12 |
| DM0.2 | 8.3 | 10 | 2 | 13 |
| PM2 | 140.9 | 40 | 2 | 14 |
| Pd/ZnO NPs | 73.4 | 40 | 2 | 15 |
| MoS2/MoO3 | 27.3 | 50 | 2 | 16 |
| CeO2@CuBr | 7.4 | 5 | 2 | 17 |
| n-GaN-Au/PANI-ET50 | 93.3 | 100 | 3 | 18 |
| Pt/MP-2 | 24 | 50 | 3 | 19 |
| *p*-PP/CNT/PANI | 11.1 | 70 | 3 | 25 |
| PAN/MWCNTs/PANI | 20 | 100 | 3 | 22 |
| PIW-5 | 17.3 | 100 | 3 | 23 |
| CoSnO3@MOF@PDMS | 6.2 | 100 | 3 | 24 |
| PANI/PMMA/PS/MWCNTs | 153.8 | 5 | 4 | 20 |

**Table S5.** Crystallographic information of **Cd-NTP**.

| Crystal data | **Cd-NTP** |
| --- | --- |
| Empirical formula | C24H18Cd2N4O9S4 |
| Formula weight | 859.46 |
| Temperature/K | 100.15 |
| Crystal system | triclinic |
| Space group | *P*-1 |
| *a*/Å | 7.2736(1) |
| *b*/Å | 14.0708(2) |
| *c*/Å  *α*/°  *β*/° | 28.4118(7)  89.135(2)  88.052(2) |
| *γ*/° | 89.067(1) |
| *V*/Å3 | 2905.44(9) |
| *Z* | 4 |
| *ρcalc*/gcm-3 | 1.965 |
| *μ*/mm‑1 | 14.934 |
| *F* (000) | 1688.0 |
| Radiation | Cu-K*α* (*λ* = 1.54184) |
| Reflections collected | 11630 |
| Independent reflections | 11630 [R*sigma* = 0.0840] |
| Data/restraints/parameters | 11630/31/781 |
| 2theta range for data collection/° | 6.226 to 152.218 |
| Index ranges | -9 ≤ *h* ≤ 9, -17 ≤ *k* ≤ 17, 0 ≤ *l* ≤ 35 |
| GOF on *F2* | 1.228 |
| Final *R* indexes [*I>=2σ (I)*] | *R1 =* 0.1058*, wR2 =* 0.2910 |
| Final *R* indexes [all data] | *R1* = 0.1108, *wR2* = 0.2933 |
| Largest diff. peak/hole / eÅ-3 | 6.10/-3.61 |

**Table S6.** Unit cell parameters of **Cd-NTP** after Pawley refinement of XRD data.

| Crystal data | **Cd-NTP** |
| --- | --- |
| *a*/Å | 7.14081 |
| *b*/Å | 13.91176 |
| *c*/Å  *α*/°  *β*/° | 28.28670  89.90238  88.19641 |
| *γ*/° | 89.27287 |

**References**

1. Dolomanov, O. V., Blake, A. J., Champness, N. R. & Schröder, M. OLEX: new software for visualization and analysis of extended crystal structures. *J. Appl. Crystallogr.* **36**, 1283-1284 (2003).

2. Sheldrick, G. M. SHELXT - integrated space-group and crystal-structure determination. *Acta Cryst. A* **71**, 3-8 (2015).

3. Zhou, Y. *et al.* MXene Ti3C2Tx-derived nitrogen-functionalized heterophase TiO2 homojunctions for room-temperature trace ammonia gas sensing. *ACS Appl. Mater. Interfaces* **13**, 56485-56497 (2021).

4. Safe, A. M., Nikfarjam, A. & Hajghassem, H. UV enhanced ammonia gas sensing properties of PANI/TiO2 core-shell nanofibers. *Sensor Actuat. B-Chem.* **298**, 126906 (2019).

5. Xu, L. *et al.* Two-birds-one-stone: Flexible PANI film with bionic microstructures for multifunctional sensing of physical and chemical stimuli. *Chem. Eng. J.* **451**, 138820 (2023).

6. Zhu, C. *et al.* Self-assembly polyaniline films for the high-performance ammonia gas sensor. *Sensor Actuat. B-Chem.* **365**, 131928 (2022).

7. Han, D. *et al.* Au nanoparticles decorated GaN nanoflowers with enhanced NH3 sensing performance at room temperature. *Sensor Actuat. B-Chem.* **394**, 134320 (2023).

8. Yao, G. *et al.* P-type Sb doping hierarchical WO3 microspheres for superior close to room temperature ammonia sensor. *Sensor Actuat. B-Chem.* **359**, 131365 (2022).

9. Zou, Z. *et al.* Room-temperature optoelectronic gas sensor based on core-shell g-C3N4@WO3 heterocomposites for efficient ammonia detection. *Anal. Chem.* **95**, 2110-2118 (2023).

10. Yuan, Z., Lei, Y., Li, X., Meng, F. & Gao, H. WO₃ nanosheets/FeCo₂O₄ nanoparticles heterostructures for highly sensitive and selective ammonia sensors. *IEEE Sens. J.* **21**, 26515-26525 (2021).

11. Chao, J. F., Liu, Z. D., Xing, S. M., Gao, Q. & Zhao, J. Z. Enhanced ammonia detection of gas sensors based on square-like tungsten oxide loaded by Pt nanoparticles. *Sensor Actuat. B-Chem.* **347**, 130621 (2021).

12. Gasso, S., Carrier, J., Radu, D. & Lai, C. Y. Novel gas sensing approach: ReS2/Ti3C2Tx heterostructures for NH3 detection in humid environments. *ACS Sens.* **9**, 4788-4802 (2024).

13. Ou, Y. *et al.* 2D/2D Dy2O3 nanosheet/MoO3 nanoflake heterostructures for humidity-independent and sensitive ammonia detection. *ACS Sens.* **8**, 4253-4263 (2023).

14. Zhu, C., Zhou, T., Xia, H. & Zhang, T. Flexible room-temperature ammonia gas sensors based on PANI-MWCNTs/PDMS film for breathing analysis and food safety. *Nanomaterials* **13**, 1158 (2023).

15. Mhlongo, G. H., Motaung, D. E., Cummings, F. R., Swart, H. C. & Ray, S. S. A highly responsive NH3 sensor based on Pd-loaded ZnO nanoparticles prepared via a chemical precipitation approach. *Sci. Rep.* **9**, 9881 (2019).

16. Singh, S., Deb, J., Sarkar, U. & Sharma, S. MoS2/MoO3 nanocomposite for selective NH3 detection in a humid environment. *ACS Sustainable Chem. Eng* **9**, 7328-7340 (2021).

17. Li, H. Y., Lee, C. S., Kim, D. H. & Lee, J. H. Flexible room-temperature NH3 sensor for ultrasensitive, selective, and humidity-independent gas detection. *ACS Appl. Mater. Interfaces* **10**, 27858-27867 (2018).

18. Han, D. *et al.* Machine-learning-assisted n-GaN-Au/PANI gas sensor array for intelligent and ultra-accurate ammonia recognition. *Chem. Eng. J.* **495**, 153705 (2024).

19. Tian, X., Cui, X., Xiao, Y., Chen, T., Xiao, X. & Wang, Y. Pt/MoS2/polyaniline nanocomposite as a highly effective room temperature flexible gas sensor for ammonia detection. *ACS Appl. Mater. Interfaces* **15**, 9604-9617 (2023).

20. Saad Ali, S., Pauly, A., Brunet, J., Varenne, C. & Ndiaye, A. L. MWCNTs/PMMA/PS composites functionalized PANI: electrical characterization and sensing performance for ammonia detection in a humid environment. *Sensor Actuat. B-Chem.* **320**, 128364 (2020).

21. Maity, A., Raychaudhuri, A. K. & Ghosh, B. High Sensitivity NH3 Gas Sensor with Electrical Readout Made on Paper With Perovskite Halide as Sensor Material. *Sci. Rep.* **9**, 7777 (2019).

22. Dong, H. *et al.* Ultra-flexible, breathable, and robust PAN/MWCNTs/PANI nanofiber networks for high-performance wearable gas sensor application. *ACS Sens.* **9**, 3085-3095 (2024).

23. Gao, W. *et al.* Humidity-tolerant Ammonia Gas Sensors Based on PrOx/In2O3/WO3 Heterostructure Films. *Chem. Eng. J.* **509**, 161482161482 (2025).

24. Qu, F. *et al.* Surface Functionalized Sensors for Humidity-Independent Gas Detection. *Angew. Chem. Int. Ed.* **60**, 6561-6566 (2021).

25. Wu, G. *et al.* A wearable mask sensor based on polyaniline/CNT nanocomposites for monitoring ammonia gas and human breathing. *Sensor Actuat. B-Chem.* **375**, 132858 (2023).

26. Guo, Z. W. *et al.* An all-inorganic three-dimensional polyoxoniobate framework with ppb-level chemiresistive sensing for ammonia. *Nat. Commun.* **16**, 6379 (2025).

27. Ali, S., Jameel, M. A., Gupta, A., Shafiei, M. & Langford, S. J. A room temperature functioning ammonia sensor utilising a bis-phenylalanine naphthalene diimide. *Sensors and Actuators A: Physical* **348**, 114008 (2022).

28. Meng, Z., Aykanat, A. & Mirica, K. A. Welding metallophthalocyanines into bimetallic molecular meshes for ultrasensitive, low-power chemiresistive detection of gases. *J Am Chem Soc* **141**, 2046-2053 (2019).

29. Chen, X. *et al.* Ultrafast in situ synthesis of large-area conductive metal-organic frameworks on substrates for flexible chemiresistive sensing. *ACS Appl. Mater. Interfaces* **12**, 57235-57244 (2020).

30. Jo, Y. M., Kim, D. H., Wang, J., Oppenheim, J. J. & Dinca, M. Humidity-mediated dual ionic-electronic conductivity enables high sensitivity in MOF chemiresistors. *J. Am. Chem. Soc.* **146**, 20213-20220 (2024).

31. Wang, B., Xing, Y., Zhang, K., Wang, Z., Xia, Y. & Long, X. Electron-Deficient Organic Molecules Based on B←N Unit: A N-Type Room-Temperature Chemiresistive Sensors with Moisture Resistance. *Adv. Sci.* **11**, 2409890 (2024).

32. Lin, Y., Li, W. H., Wen, Y., Wang, G. E., Ye, X. L. & Xu, G. Layer-by-layer growth of preferred-oriented MOF thin film on nanowire array for high-performance chemiresistive sensing. *Angew. Chem. Int. Ed.* **60**, 25758-25761 (2021).

33. Shafiei, M., Hoshyargar, F., Lipton-Duffin, J., Piloto, C., Motta, N. & O'Mullane, A. P. Conversion of n-type CuTCNQ into p-type nitrogen-doped CuO and the Implication for room-temperature gas sensing. *J. Phys. Chem. C* **119**, 22208-22216 (2015).

34. Campbell, M. G., Sheberla, D., Liu, S. F., Swager, T. M. & Dinca, M. Cu3(hexaiminotriphenylene)2: an electrically conductive 2D metal-organic framework for chemiresistive sensing. *Angew. Chem. Int. Ed.* **54**, 4349-4352 (2015).

35. Duy, L. T. *et al.* Flexible transparent reduced graphene gxide sensor coupled with organic dye molecules for rapid dual‐mode ammonia gas detection. *Adv. Funct. Mater.* **26**, 4329-4338 (2016).

36. Kumar, R., Kumar, R., Kushwaha, N. & Mittal, J. Ammonia gas sensing using thin film of MnO2 nanofibers. *IEEE Sens. J.* **16**, 4691-4695 (2016).

37. Dong, X. *et al.* A novel coral-shaped Dy2O3 gas sensor for high sensitivity NH3 detection at room temperature. *Sensor Actuat. B-Chem.* **255**, 1308-1315 (2018).

38. Lee, K., Gatensby, R., McEvoy, N., Hallam, T. & Duesberg, G. S. High-performance sensors based on molybdenum disulfide thin films. *Adv. Mater.* **25**, 6699-6702 (2013).

39. Yao, M. S. *et al.* A dual-ligand porous coordination polymer chemiresistor with modulated conductivity and porosity. *Angew. Chem. Int. Ed.* **59**, 172-176 (2020).

40. Xue, M., Li, F., Chen, D., Yang, Z., Wang, X. & Ji, J. High-oriented polypyrrole nanotubes for next-generation gas sensor. *Adv. Mater.* **28**, 8265-8270 (2016).

41. Yang, Y., Zhang, G., Luo, H., Yao, J., Liu, Z. & Zhang, D. Highly sensitive thin-film field-effect transistor sensor for ammonia with the DPP-bithiophene conjugated polymer entailing thermally cleavable tert-butoxy groups in the side chains. *ACS Appl. Mater. Interfaces* **8**, 3635-3643 (2016).
